# Supplementary material for: Hydrosilane and bismuth-accelerated palladium catalyzed aerobic oxidative esterification of benzylic alcohols with air
Source: Royal Society of Chemistry journal article supplement (doi:10.1039/c2cc34117d), 2012-01-01

# Hydrosilane and Bismuth-accelerated Palladium Catalyzed Aerobic Oxidative Esterification of Benzylic Alcohols with Air

Xing-Feng Bai<sup>[a]</sup>, Fei Ye<sup>[a]</sup>, Long-Sheng Zheng<sup>[a]</sup>, Guo-Qiao Lai<sup>[a]</sup>, Chun-Gu Xia<sup>[b]</sup>, and Li-Wen Xu<sup>\*[a,b]</sup>

[a] *Key Laboratory of Organosilicon Chemistry and Material Technology of Ministry of Education Hangzhou Normal University, Hangzhou 310012, China*

[b] *State Key Laboratory for Oxo Synthesis and Selective Oxidation, Lanzhou Institute of Chemical Physics, Chinese Academy of Sciences, Lanzhou, 730000, P. R. China*

Fax: (+86)-571-28865135

E-mail: [liepxulw@yahoo.com](mailto:liepxulw@yahoo.com) and [liwenxu@hznu.edu.cn](mailto:liwenxu@hznu.edu.cn)

## *Supporting Information*

### **Table of Contents**

|    |                                                                                                      |    |
|----|------------------------------------------------------------------------------------------------------|----|
| 1. | <i>General information.....</i>                                                                      | 2  |
| 2. | <i>A typical procedure for the oxidation of benzyl alcohol to methyl benzoate.....</i>               | 2  |
| 3. | <i>Table S1. Palladium-catalyzed oxidation in the presence of PMHS.....</i>                          | 4  |
| 4. | <i>Table S2. The effects of bases on palladium-catalyzed oxidation.....</i>                          | 5  |
| 5. | <i>Table S3. The effects of metal salts on the palladium-catalyzed oxidative esterification.....</i> | 6  |
| 6. | <i>The analytical and spectral characterization data of the methyl benzoates .....</i>               | 7  |
| 7. | <i>Figure S1. SEM image of the polysiloxane (PMHS)-stabilized Pd@PMS after reaction</i>              | 11 |
| 8. | <i><sup>1</sup>H-NMR of methyl benzoates.....</i>                                                    | 12 |

## ***1. General information***

Solvents used in the reactions were distilled from CaH<sub>2</sub>. The polymethylhydrosiloxane (PMHS) (M<sub>w</sub> ≈ 2500, Viscosity(25°C), mm<sup>2</sup>/MS:10 - 50; Hydroxyl content: 1.55 - 1.60 w/w%; density (25°C), g/cm<sup>3</sup>: 0.995 - 1.015) was purchasing from Chengxing County Chemical Co., Ltd., located in Kaihua, Zhejiang province, China. Other reagents are commercially available and used directly without further purification. Flash column chromatography was performed over silica (200-300 mesh). <sup>1</sup>H-NMR and <sup>13</sup>C-NMR spectra were recorded at 400 and 100 MHz, respectively on Advance (Brucker) 400 MHz Nuclear Magnetic Resonance Spectrometry, and were referenced to the internal solvent signals. Thin layer chromatography was performed using silica gel; GF<sub>254</sub> TLC plates and visualized with ultraviolet light. The products of the oxidation reaction was known and confirmed by GC-Mass, and usual spectral methods (<sup>1</sup>H-NMR).

## ***2. A typical procedure for the oxidation of benzylic alcohol to methyl benzoate.***

Under air atmosphere, benzylic alcohol (0.5 mmol) was added to a dry tube containing Pd(OAc)<sub>2</sub> (0.025mmol), BiCl<sub>3</sub> (0.05 mmol), K<sub>2</sub>CO<sub>3</sub> (1 mmol), PMHS (0.1mmol, calculated on the Si-H hydrogen content) and methanol (2 mL). And the mixture was stirring at room temperature for 2 hour. After the reaction was completed, the reaction mixture was diluted with water and extracted with ethyl acetate. The combined organic layers were subsequently concentrated and the crude product was purified by flash chromatography. The products of oxidative esterification are known compounds and confirmed by NMR and GC-MS.

It should be noted that no ester was detected with only bismuth catalyst in the absence of palladium catalyst.

**Scheme S1.** Proposed mechanism of palladium-catalyzed transformation of benzyl alcohol to various products (Table 1) in the presence of hydrosilane or PMHS

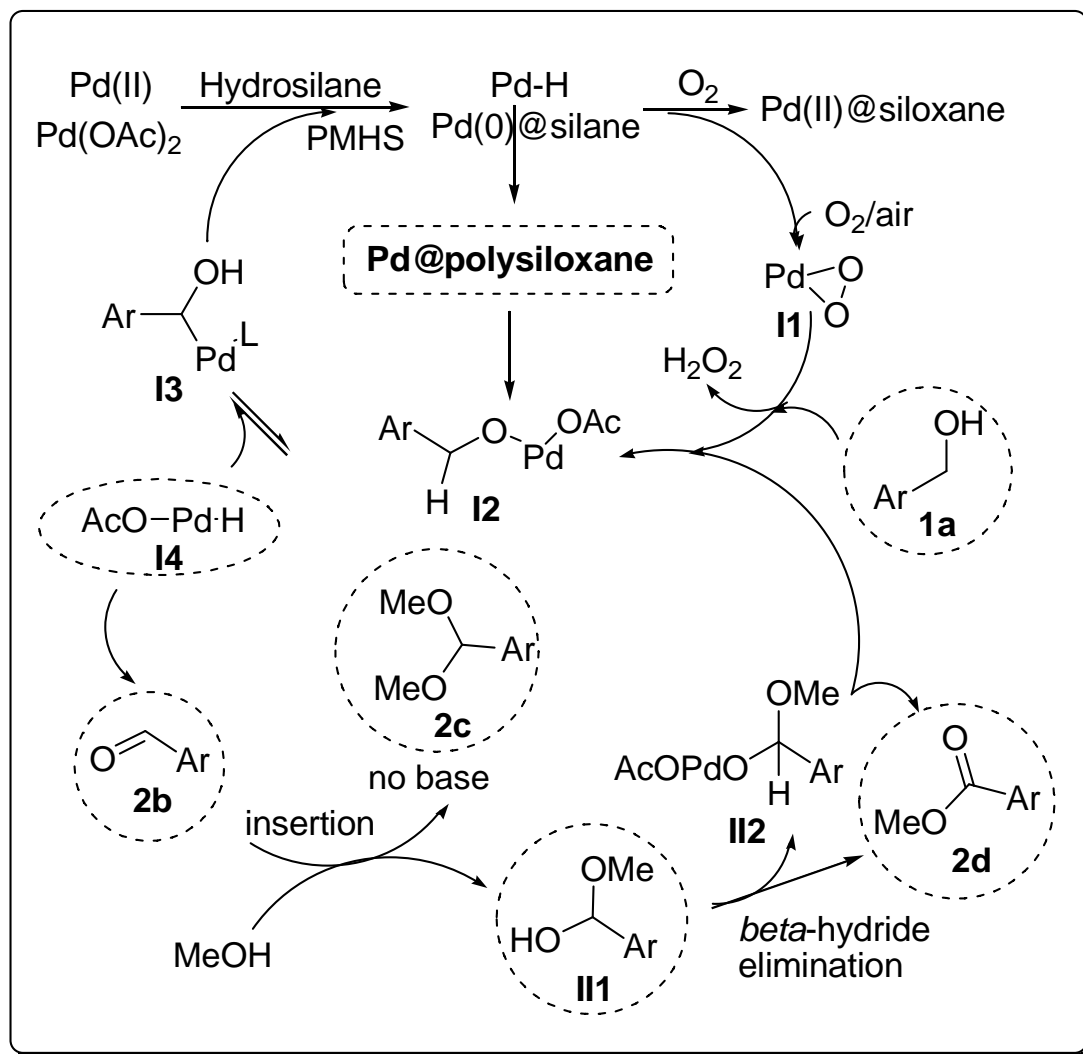

**Note:**

For the product **2b** (benzaldehyde): The palladium(II) was activated by hydrosilane to form activated Pd(0) catalyst, and then the oxidative addition of oxygen to Pd(0) generated the intermediate (**I1**). The following alcoholysis step selectively occurred with alcohol to generate the alkoxy palladium intermediate **I2** with the aid of a base. In the last step, direct β-hydride elimination to afford the aldehyde and the palladium hydride intermediate **I4** which undergoes reductive elimination to regenerate Pd(0) species.

For the product **2c** (1-(dimethoxymethyl)benzene): In the absence of base, the acetal **2c** was formed from the reaction of benzaldehyde and methanol directly.

**Table S1.** Palladium-catalyzed oxidation in the presence of PMHS

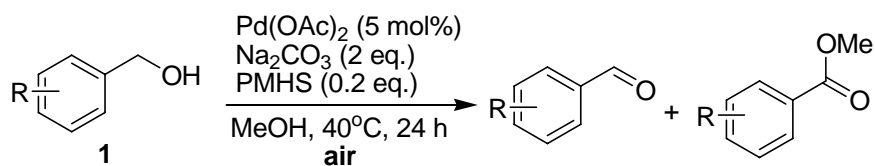

| Entry | Substrate | Conversion % | Yield % <sup>[a]</sup> |       |
|-------|-----------|--------------|------------------------|-------|
|       |           |              | Aldehyde               | Ester |
| 1     |           | 47           | 43                     | <5    |
| 2     |           | 40           | 15                     | 25    |
| 3     |           | >99          | 69                     | 31    |
| 4     |           | 23           | 0                      | 23    |
| 5     |           | 51           | 50                     | <5    |
| 6     |           | >99          | 95                     | <5    |

[a] Reaction conditions: alcohol (0.5 mmol), 5 mol% of Pd(OAc)<sub>2</sub>, 20 mol% of PMHS, and 2 eq. Na<sub>2</sub>CO<sub>3</sub>, 3 mL of MeOH, 40°C, for 12 hrs. The yield was determined by GC.

**Table S2.** The effects of bases on palladium-catalyzed oxidation

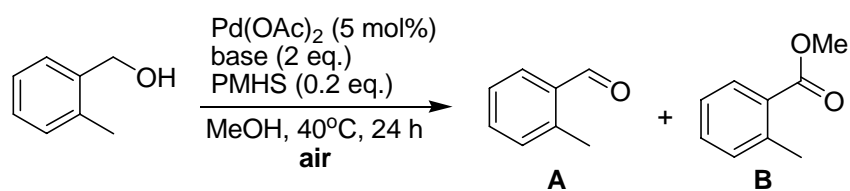

| Entry | Base                            | Temperature/°C | Conversion % | Yield%/A | Yield/B |
|-------|---------------------------------|----------------|--------------|----------|---------|
| 1     | Na <sub>2</sub> CO <sub>3</sub> | 40             | 47           | 43       | <5      |
| 2     | K <sub>2</sub> CO <sub>3</sub>  | 40             | 76           | 65       | 11      |
| 3     | Cs <sub>2</sub> CO <sub>3</sub> | 40             | 59           | 53       | 6       |
| 4     | <i>t</i> -BuONa                 | 40             | 92           | 76       | 16      |
| 5     | <i>t</i> -BuOK                  | 40             | 81           | 70       | 11      |
| 6     | NEt <sub>3</sub>                | 40             | 21           | 19       | <5      |
| 7     | Pyridine                        | 40             | Trace        | -        | -       |
| 8     | <i>t</i> -BuONa                 | 60             | 94           | 70       | 24      |

[a] Reaction conditions: alcohol (0.5 mmol), 5 mol% of Pd(OAc)<sub>2</sub>, 20 mol% of PMHS, and 2 eq.

base, 3 mL of MeOH, 40°C, for 24 hrs. The yield was determined by GC.

**Table S3.** The effects of metal salts on the palladium-catalyzed oxidative esterification

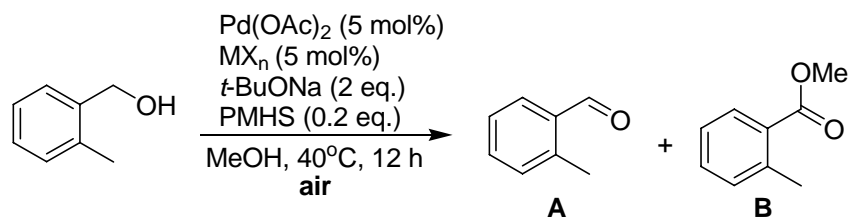

| Entry             | Base                           | MX <sub>n</sub>                                     | Conversion % | Yield % <sup>[a]</sup> |         |                                    |
|-------------------|--------------------------------|-----------------------------------------------------|--------------|------------------------|---------|------------------------------------|
|                   |                                |                                                     |              | Aldehyde/A             | Ester/B | Other side-products <sup>[b]</sup> |
| 1                 | -                              | NaBF <sub>4</sub>                                   | Trace        | -                      | -       | -                                  |
| 2                 | -                              | KPF <sub>6</sub>                                    | Trace        | -                      | -       | -                                  |
| 3                 | -                              | Na <sub>2</sub> SiO <sub>3</sub> ·9H <sub>2</sub> O | 44           | 44                     | 0       | -                                  |
| 4                 | <i>t</i> -BuONa                | CuCl                                                | 17           | 8                      | 0       | 9                                  |
| 5                 | <i>t</i> -BuONa                | CuI                                                 | 4            | <5                     | 0       | -                                  |
| 6                 | <i>t</i> -BuONa                | Cu <sub>2</sub> O                                   | 35           | 35                     | 0       | -                                  |
| 7                 | <i>t</i> -BuONa                | AgF                                                 | 98           | 52                     | 31      | 15                                 |
| 8                 | <i>t</i> -BuONa                | AgOAc                                               | >99          | 13                     | 78      | 9                                  |
| 9                 | <i>t</i> -BuONa                | AgNO <sub>3</sub>                                   | 91           | 41                     | 48      | <5                                 |
| 10 <sup>[c]</sup> | K <sub>2</sub> CO <sub>3</sub> | BiCl <sub>3</sub>                                   | >99          | <1                     | >99     | -                                  |
| 11 <sup>[c]</sup> | K <sub>2</sub> CO <sub>3</sub> | BiBr <sub>3</sub>                                   | >99          | <1                     | >99     | -                                  |
| 12 <sup>[c]</sup> | K <sub>2</sub> CO <sub>3</sub> | BiI <sub>3</sub>                                    | trace        | -                      | -       | -                                  |
| 13 <sup>[c]</sup> | K <sub>2</sub> CO <sub>3</sub> | Bi(OTf) <sub>3</sub>                                | >99          | <1                     | >99     | -                                  |
| 14 <sup>[d]</sup> | K <sub>2</sub> CO <sub>3</sub> | BiCl <sub>3</sub>                                   | >99          | <1                     | >99     | -                                  |

[a] Reaction conditions: alcohol (0.5 mmol), 5 mol% of Pd(OAc)<sub>2</sub>, 5 mol% of metal salt additive, 20 mol% of PMHS, and 2 eq. base, 3 mL of MeOH, 40°C, for 12 hrs. The yield was determined by GC. [b] The side products included decarbonyl product and acid. [c] The reaction was carried out for 8 hrs. [d] The reaction was carried out at room temperature for 2 hours in the presence of 10 mol% of BiCl<sub>3</sub>.

### 3. The analytical and spectral characterization data of the methyl benzoates.

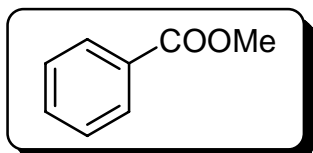

**Methyl benzoate (2d)** :  $^1\text{H NMR}$  (400 MHz,  $\text{CDCl}_3$ )  $\delta$  = 8.06 (d,  $J$  = 8.0 Hz, 2 H), 7.57 (t,  $J$  = 7.2 Hz, 1 H), 7.45 (t,  $J$  = 8.0 Hz, 2 H), 3.93 (s, 3 H).

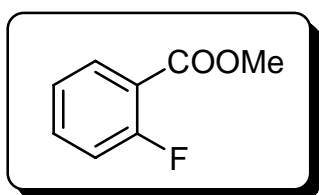

**Methyl 2-fluorobenzoate (3a)** :  $^1\text{H NMR}$  (400 MHz,  $\text{CDCl}_3$ )  $\delta$  = 7.94 (dt,  $J$  = 7.6, 1.6 Hz, 1 H), 7.55 – 7.50 (m, 1 H), 7.21 (dt,  $J$  = 8.0, 1.2 Hz, 1 H), 7.17 – 7.12 (m, 1 H), 3.94 (s, 1 H).

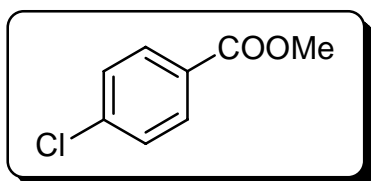

**Methyl 4-chlorobenzoate (3b)** :  $^1\text{H NMR}$  (400 MHz,  $\text{CDCl}_3$ )  $\delta$  = 7.99 (d,  $J$  = 8.4 Hz, 2 H), 7.43 (d,  $J$  = 8.4 Hz, 2 H), 3.93 (s, 3 H).

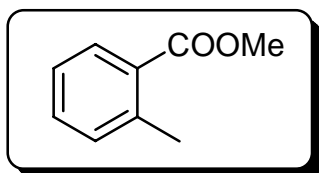

**Methyl 2-methylbenzoate (3c)** :  $^1\text{H NMR}$  (400 MHz,  $\text{CDCl}_3$ )  $\delta$  = 7.92 (d,  $J$  = 7.6 Hz, 1 H), 7.41 (t,  $J$  = 7.6 Hz, 1 H), 7.25 (t,  $J$  = 6.8 Hz, 2 H), 3.91 (s, 3 H), 2.61 (s, 3 H).

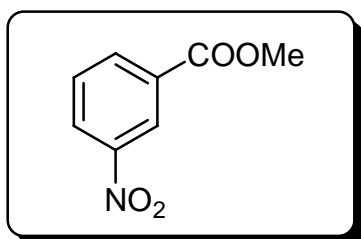

**Methyl 3-nitrobenzoate (3d)** :  $^1\text{H NMR}$  (400 MHz,  $\text{CDCl}_3$ )  $\delta$  = 8.89 (t,  $J$  = 2.0 Hz, 1 H), 8.45 - 8.42 (m, 1 H), 8.40 - 8.37 (m, 1 H), 7.67 (t,  $J$  = 8.0 Hz, 1 H), 4.00 (s, 3 H).

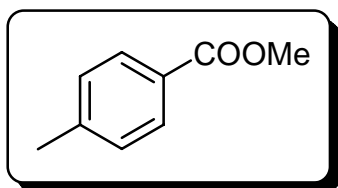

**Methyl 4-methylbenzoate (3e)** :  $^1\text{H}$  NMR (400 MHz,  $\text{CDCl}_3$ )  $\delta$  = 7.94 (d,  $J$  = 8.0 Hz, 2 H), 7.25 (d,  $J$  = 8.0 Hz, 2 H), 3.92 (s, 3 H), 2.42 (s, 3 H).

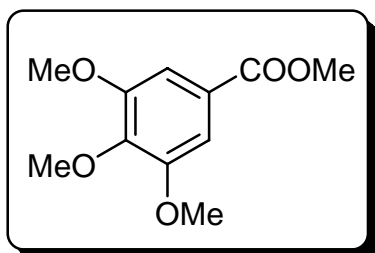

**Methyl 3,4,5-trimethoxybenzoate (3f)** :  $^1\text{H}$  NMR (400 MHz,  $\text{CDCl}_3$ )  $\delta$  = 7.31 (s, 2 H), 3.92 (s, 12 H).

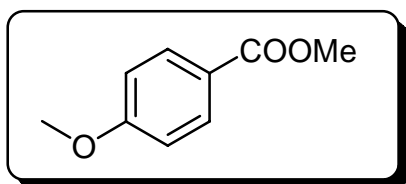

**Methyl 4-methoxybenzoate (3g)** :  $^1\text{H}$  NMR (400 MHz,  $\text{CDCl}_3$ )  $\delta$  = 8.01 (d,  $J$  = 8.8 Hz, 2 H), 6.93 (d,  $J$  = 8.8 Hz, 2 H), 3.90 (s, 3 H), 3.87 (s, 3 H).

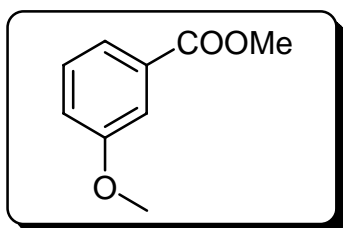

**Methyl 3-methoxybenzoate (3h)** :  $^1\text{H}$  NMR (400 MHz,  $\text{CDCl}_3$ )  $\delta$  = 7.65 (d,  $J$  = 8.0 Hz, 1 H), 7.57 (d,  $J$  = 4.0 Hz, 1 H), 7.35 (t,  $J$  = 8.0 Hz, 1 H), 7.11 (dd,  $J$  = 8.0, 2.0 Hz, 1 H), 3.93 (s, 3 H), 3.87 (s, 3 H).

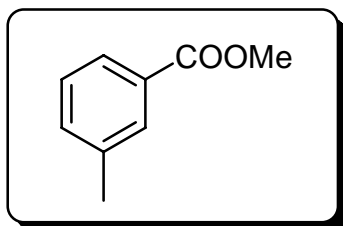

**Methyl 3-methylbenzoate (3i)** :  $^1\text{H}$  NMR (400 MHz,  $\text{CDCl}_3$ )  $\delta$  = 7.87 (s, 1 H), 7.85 (d,  $J$  = 8.4 Hz, 1 H), 7.38 – 7.31 (m, 2 H), 3.91 (s, 3 H), 2.41 (s, 3 H).



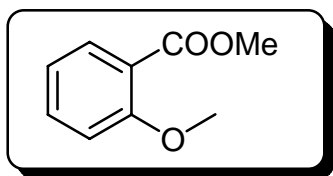

**Methyl 2-methoxybenzoate (3j)** :  $^1\text{H NMR}$  (400 MHz,  $\text{CDCl}_3$ )  $\delta$  = 7.80 (dd,  $J$  = 8.0, 2.0 Hz, 1 H), 7.47 (dt,  $J$  = 8.0, 1.6 Hz, 1 H), 6.96 – 7.00 (m, 2 H), 3.91 (s, 3 H), 3.90 (s, 3 H).

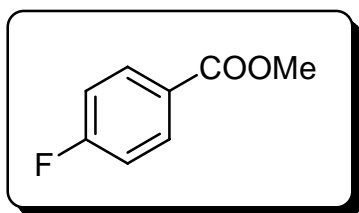

**Methyl 4-fluorobenzoate (3k)** :  $^1\text{H NMR}$  (400 MHz,  $\text{CDCl}_3$ )  $\delta$  = 8.07 (t,  $J$  = 6.8 Hz, 2 H), 7.12 (t,  $J$  = 8.4 Hz, 2 H), 3.93 (s, 3 H).

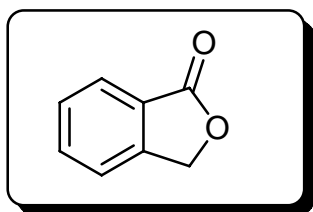

**Isobenzofuran-1(3H)-one (3l)** :  $^1\text{H NMR}$  (400 MHz,  $\text{CDCl}_3$ )  $\delta$  = 7.94 (d,  $J$  = 8.0 Hz, 1 H), 7.70 (t,  $J$  = 7.6 Hz, 1 H), 7.55 (t,  $J$  = 7.6 Hz, 1 H), 7.51 (d,  $J$  = 7.6 Hz, 1 H), 6.34 (s, 2 H).

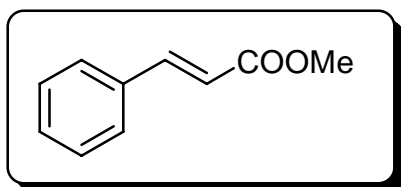

**Methyl cinnamate (3m)** :  $^1\text{H NMR}$  (400 MHz,  $\text{CDCl}_3$ )  $\delta$  = 7.72 (d,  $J$  = 16.0 Hz, 1 H), 7.54 (q,  $J$  = 3.2 Hz, 2 H), 7.40 (t,  $J$  = 3.2 Hz, 3 H), 6.46 (d,  $J$  = 16.0 Hz, 1 H), 3.83 (s, 3 H).

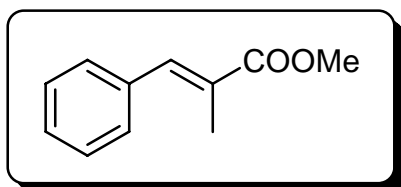

**(E)-methyl 2-methyl-3-phenylacrylate (3n)** :  $^1\text{H NMR}$  (400 MHz,  $\text{CDCl}_3$ )  $\delta$  = 7.71 (s, 1 H), 7.41 (d,  $J$  = 4.0 Hz, 4 H), 7.37 – 7.31 (m, 1 H), 3.84 (s, 3 H), 2.14 (s, 3 H).

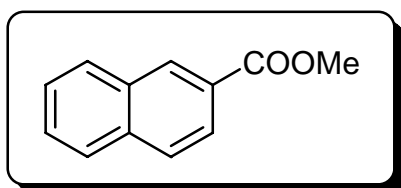

**Methyl 2-naphthoate (3o)** :  $^1\text{H}$  NMR (400 MHz,  $\text{CDCl}_3$ )  $\delta$  = 8.63 (s, 1 H), 8.08 (dd,  $J$  = 8.4, 1.6 Hz, 1 H), 7.97 (d,  $J$  = 8.0 Hz, 1 H), 7.90 (d,  $J$  = 8.4 Hz, 2 H), 7.63 – 7.54 (m, 2 H), 4.00 (s, 3 H).

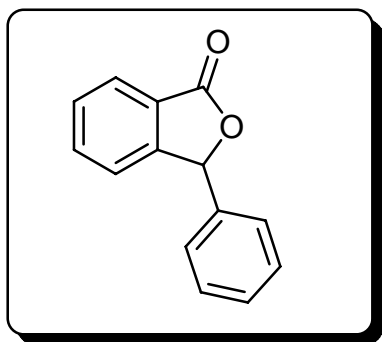

**3-phenylisobenzofuran-1(3H)-one(5a)** :  $^1\text{H}$  NMR (400 MHz,  $\text{CDCl}_3$ )  $\delta$  = 7.98 (d,  $J$  = 7.6 Hz, 1 H), 7.66 (dt,  $J$  = 7.6, 1.2 Hz, 1 H), 7.57 (t,  $J$  = 7.6 Hz, 1 H), 7.41 - 7.39 (m, 3 H), 7.35 (d,  $J$  = 7.6 Hz, 1 H), 7.31 - 7.28 (m, 2 H), 6.42 (s, 1 H).

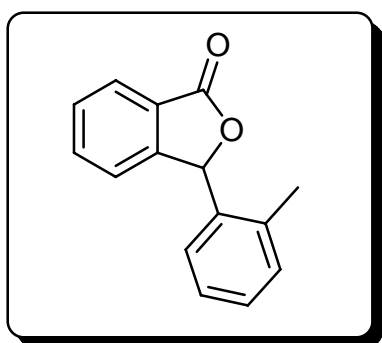

**3-o-tolylisobenzofuran-1(3H)-one(5b)** :  $^1\text{H}$  NMR (400 MHz,  $\text{CDCl}_3$ )  $\delta$  = 7.99 (d,  $J$  = 7.6 Hz, 1 H), 7.69 (t,  $J$  = 3.6 Hz, 1 H), 7.59 (t,  $J$  = 3.6 Hz, 1 H), 7.36 (d,  $J$  = 7.6 Hz, 1 H), 7.31 - 7.26 (m, 2 H), 7.14 (dt,  $J$  = 8.0, 2.8 Hz, 1 H), 6.94 (d,  $J$  = 8.0 Hz, 1 H), 6.70 (s, 1 H), 2.51 (s, 3 H).

**Figure S1.** SEM image of the polysiloxane(PMHS)-stabilized Pd@PMS after reaction

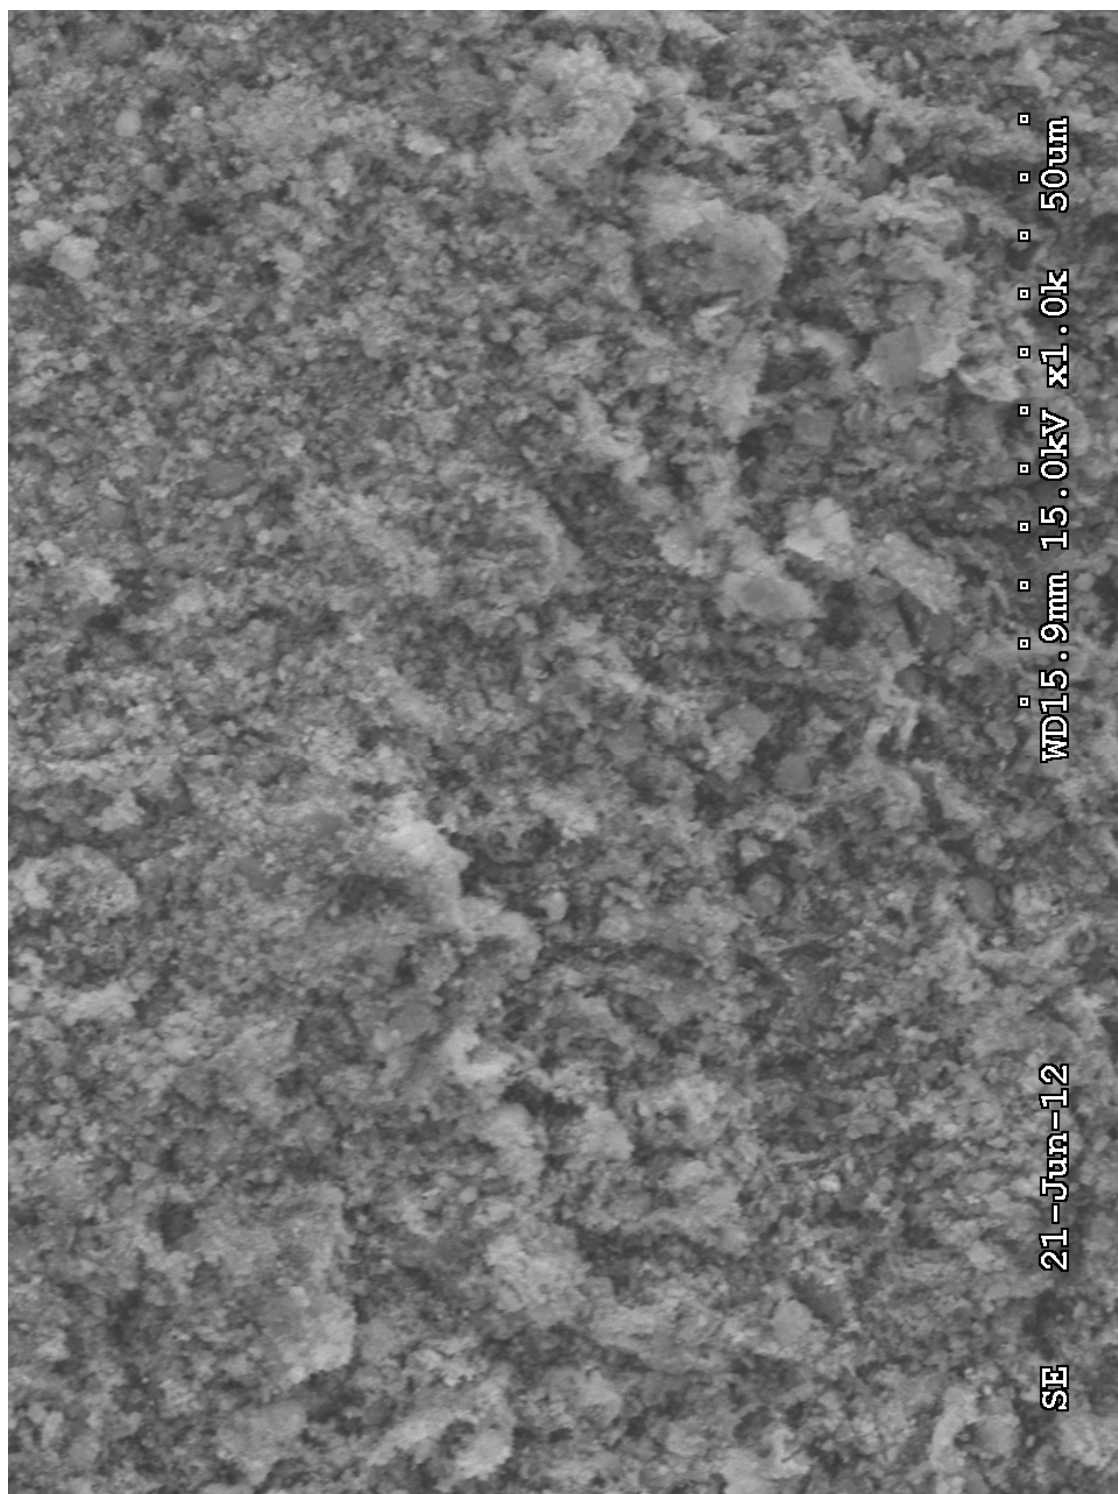

#### 4. $^1\text{H-NMR}$ of methyl benzoates.

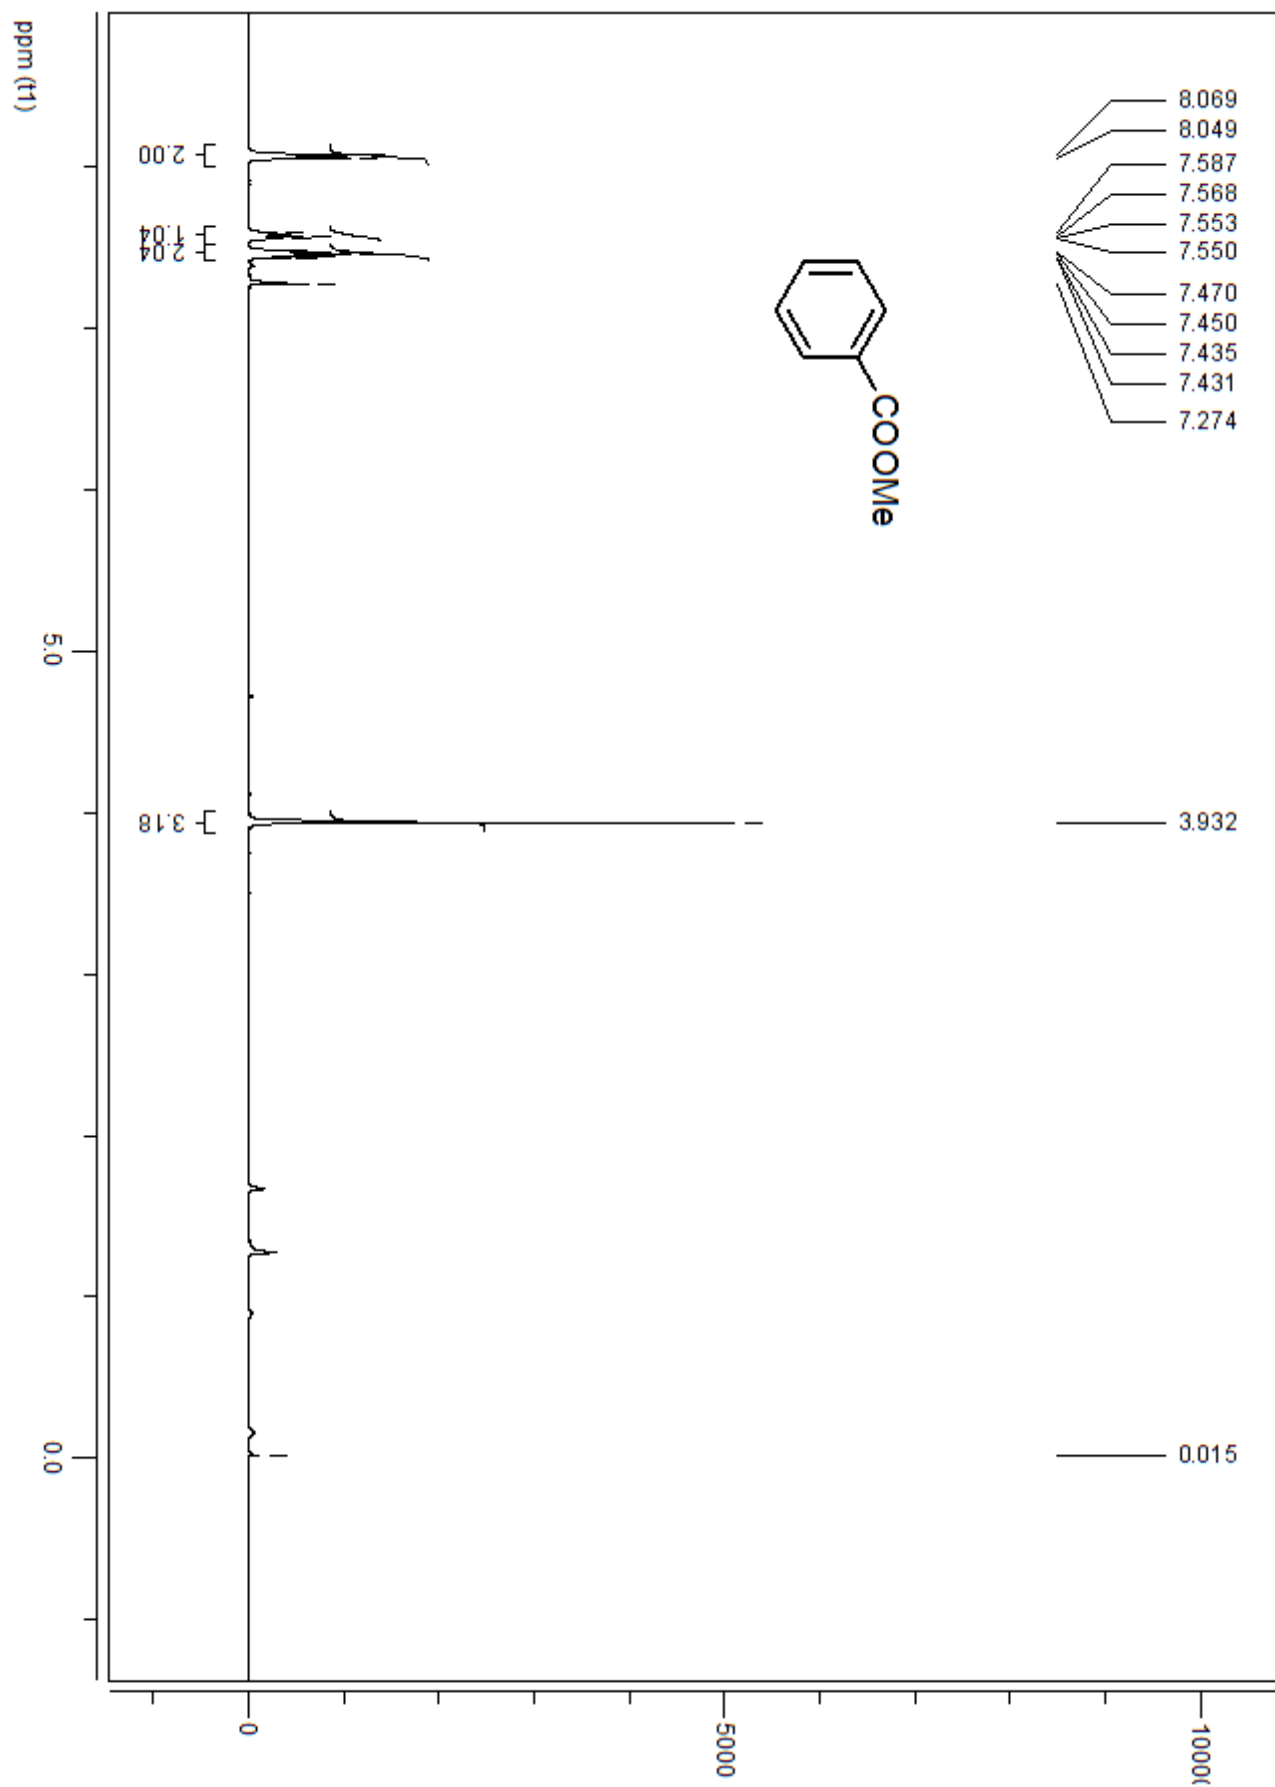

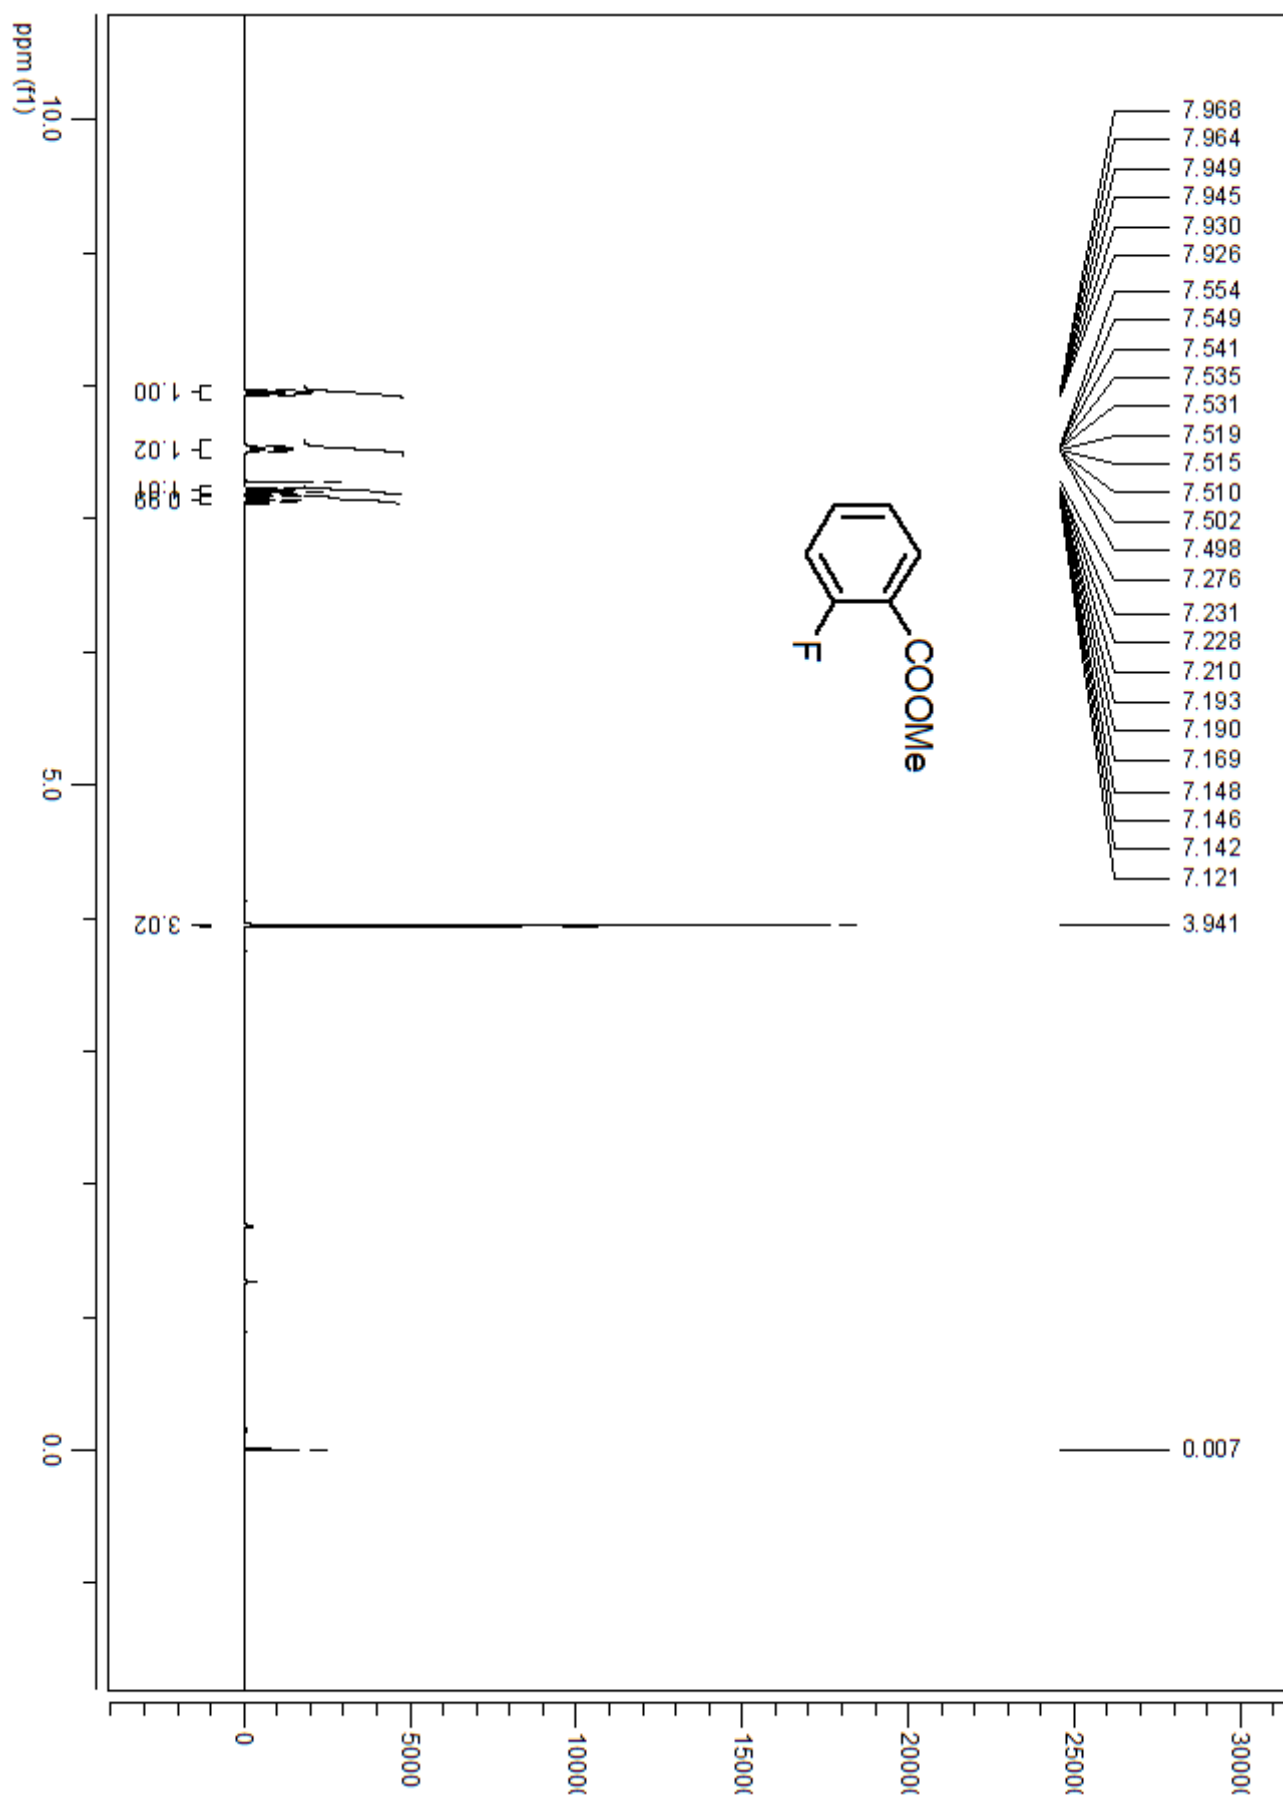

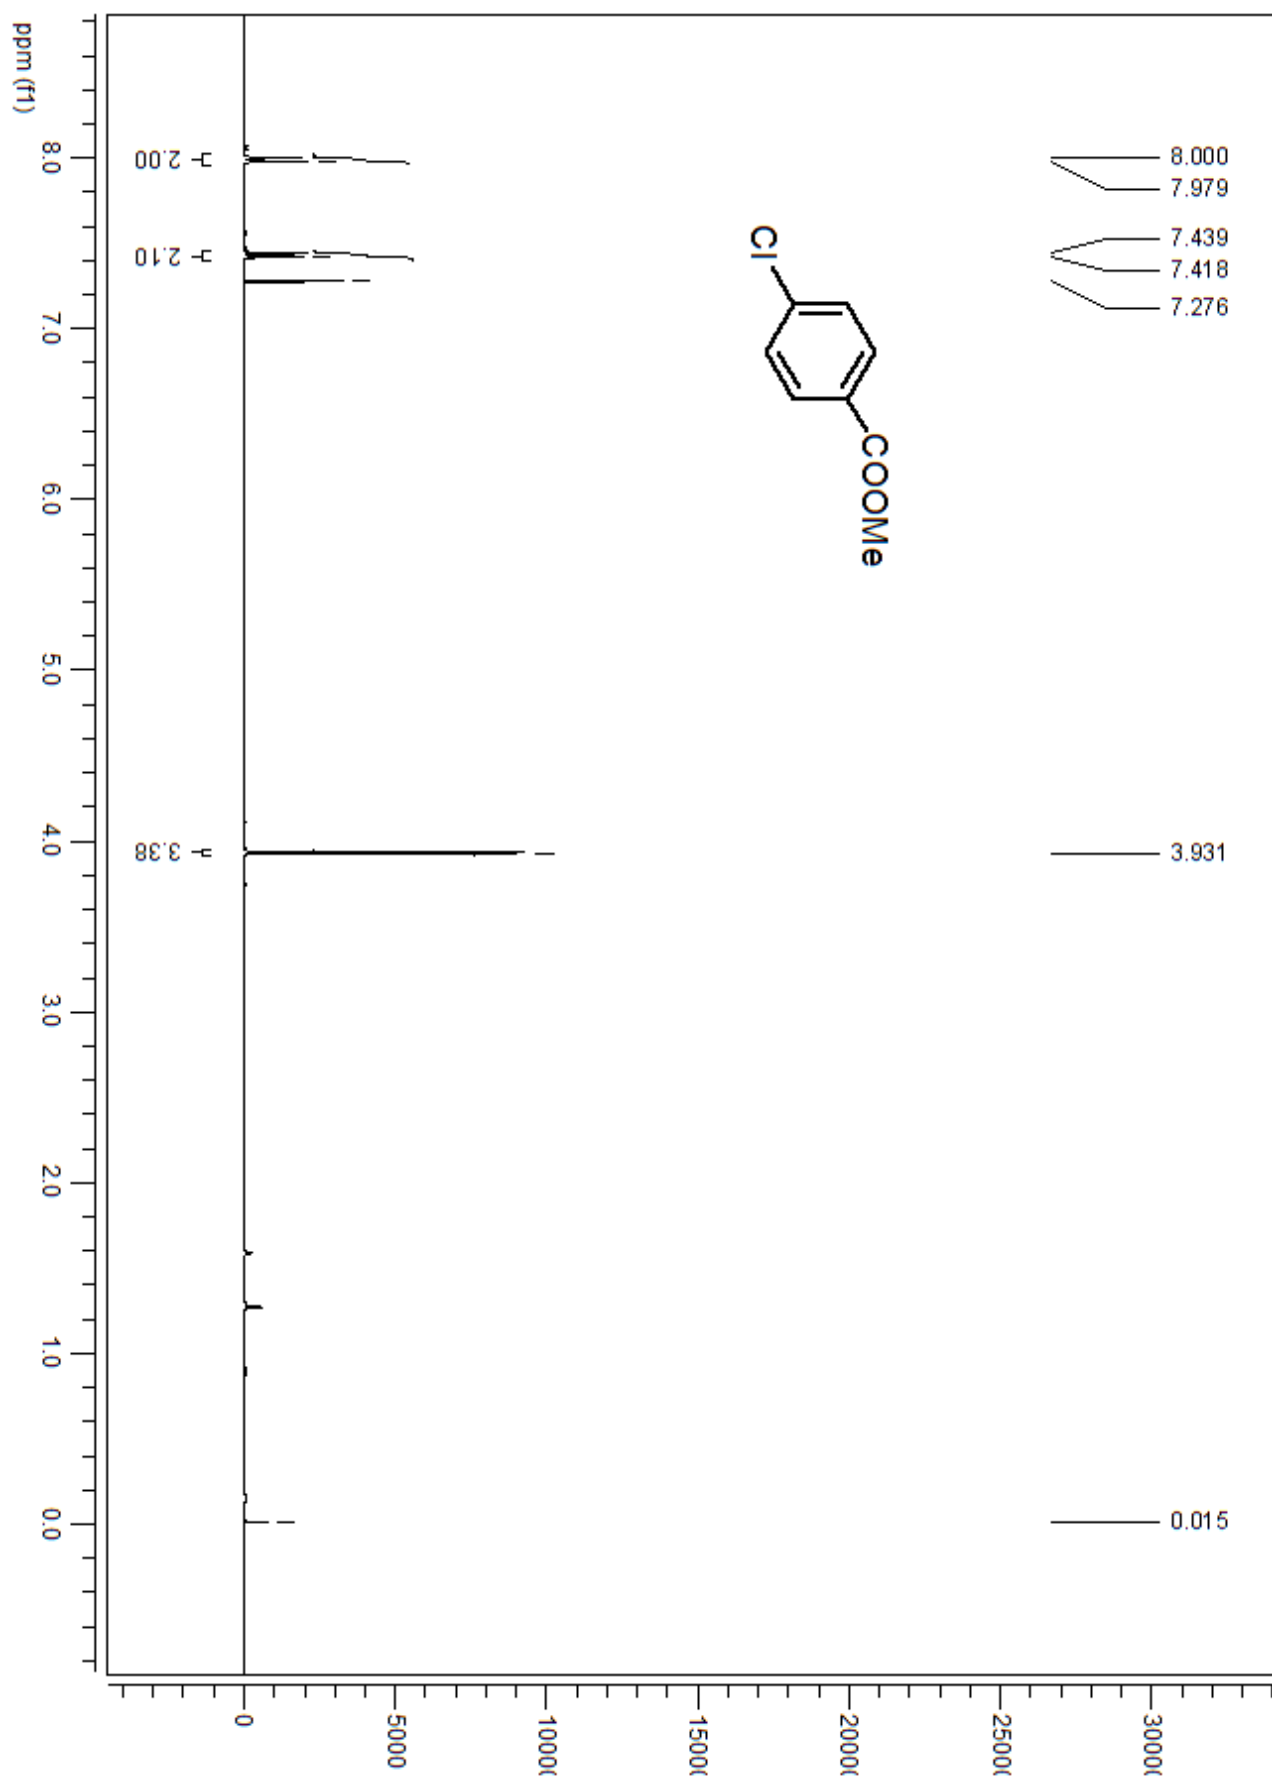

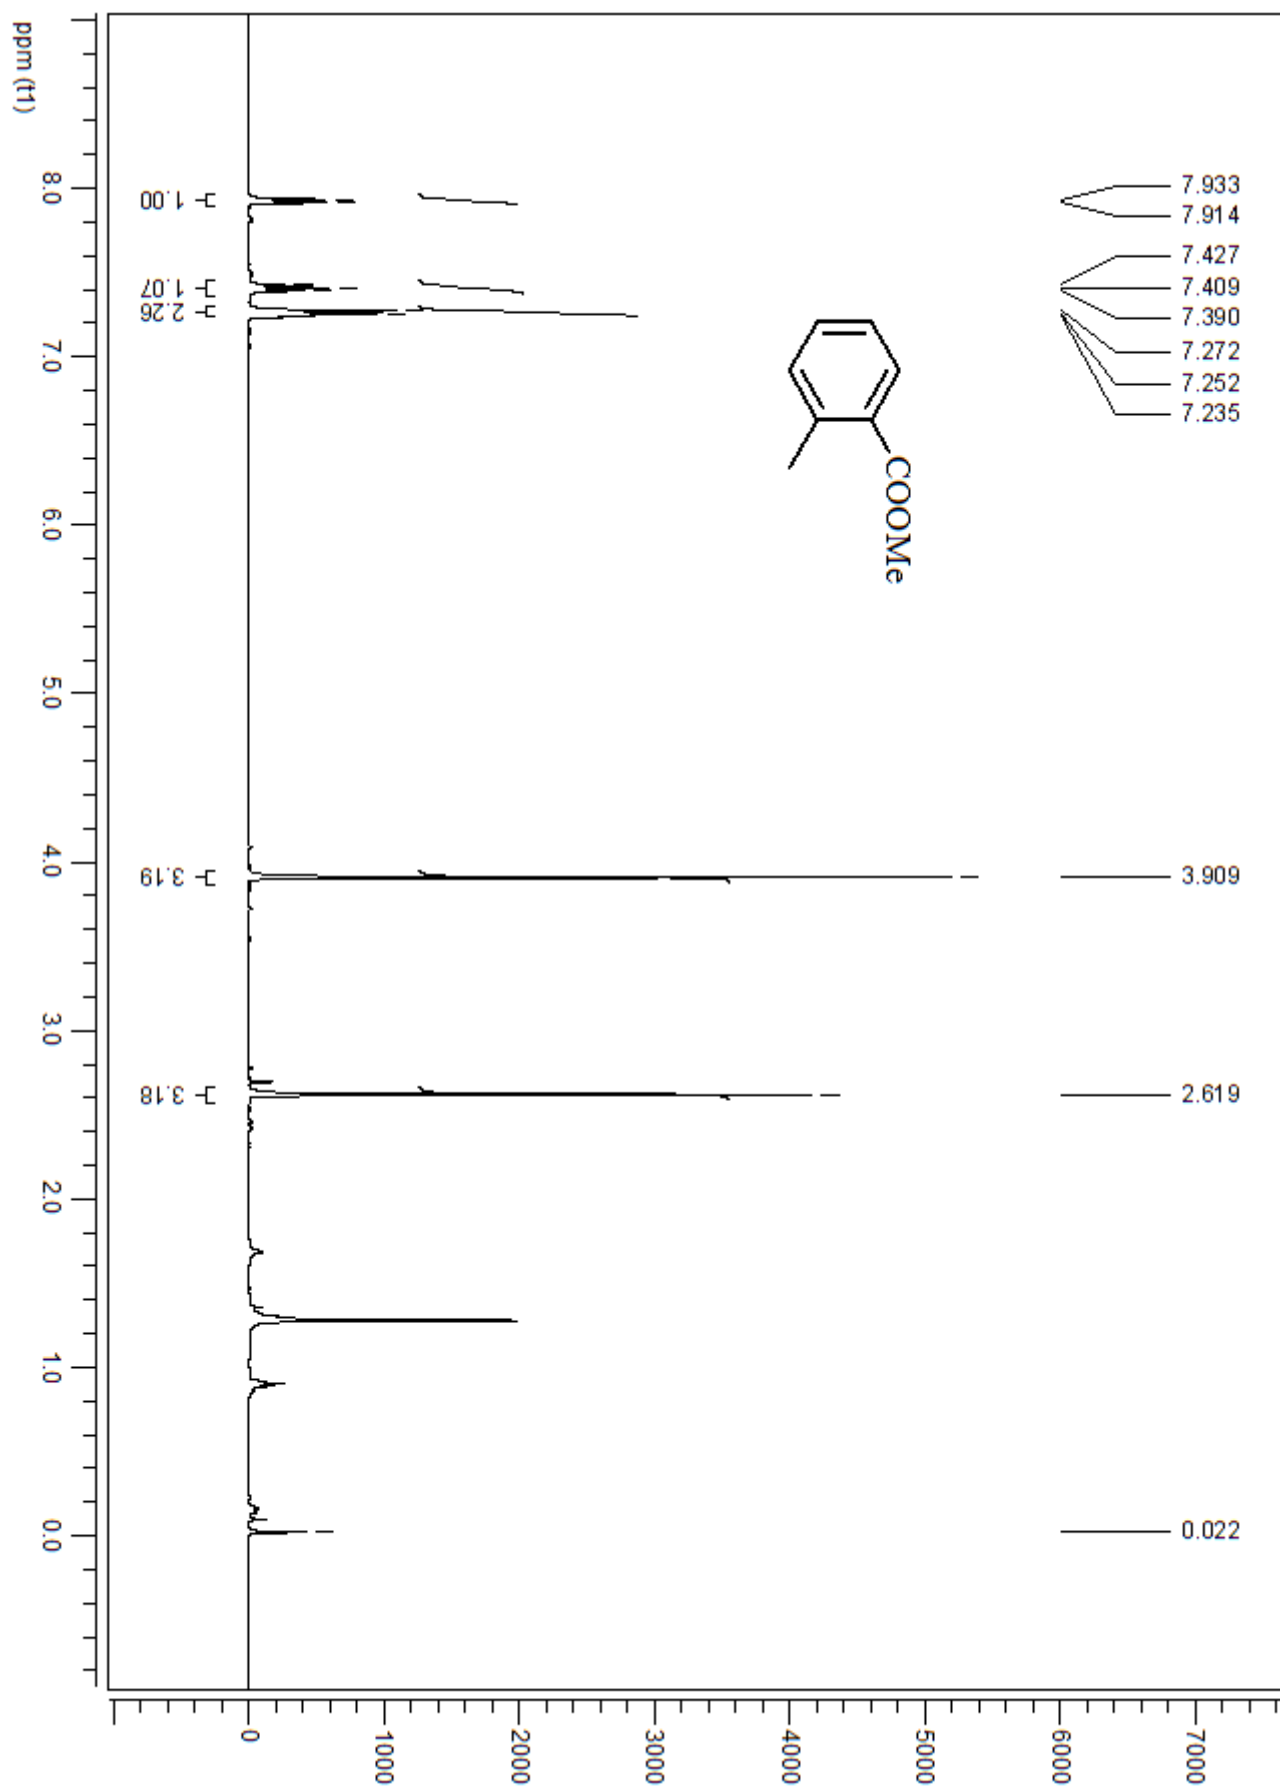

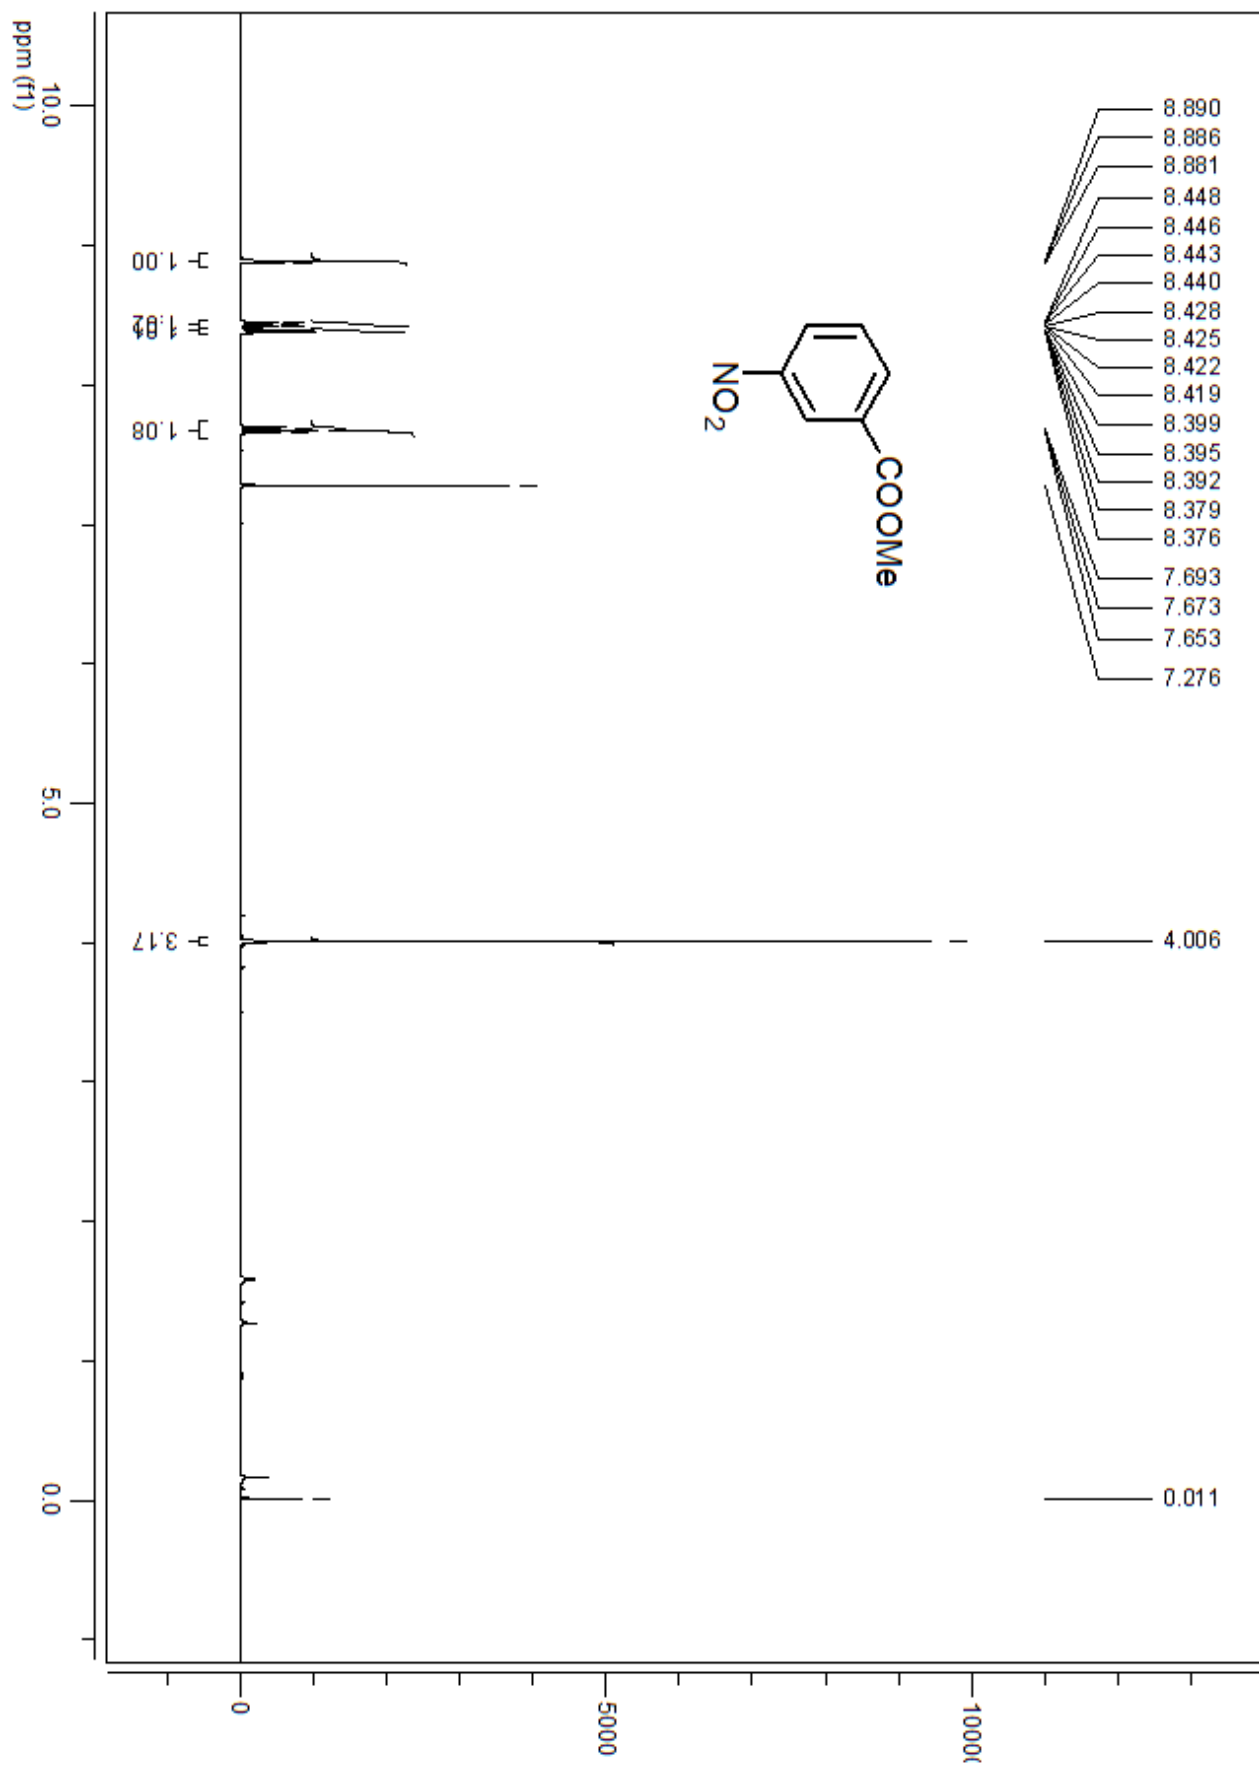



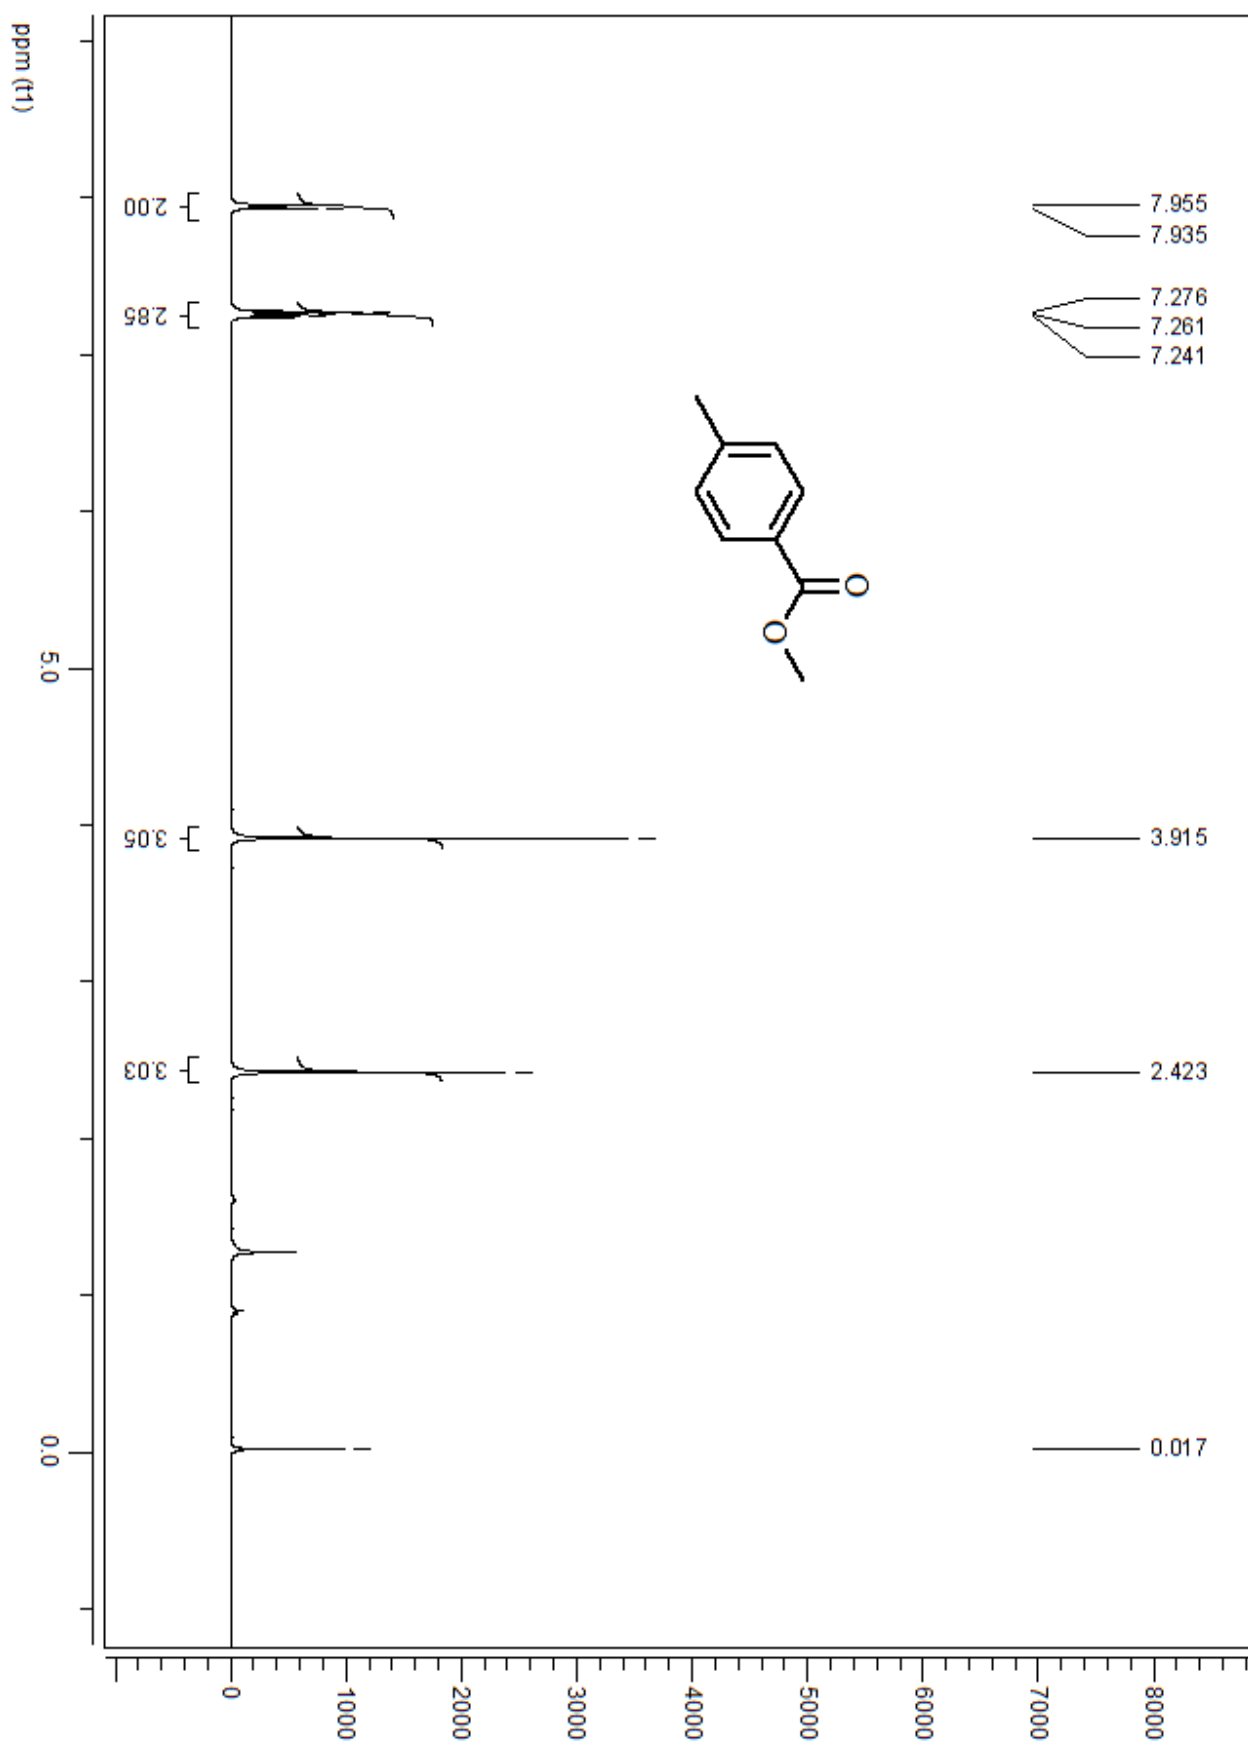

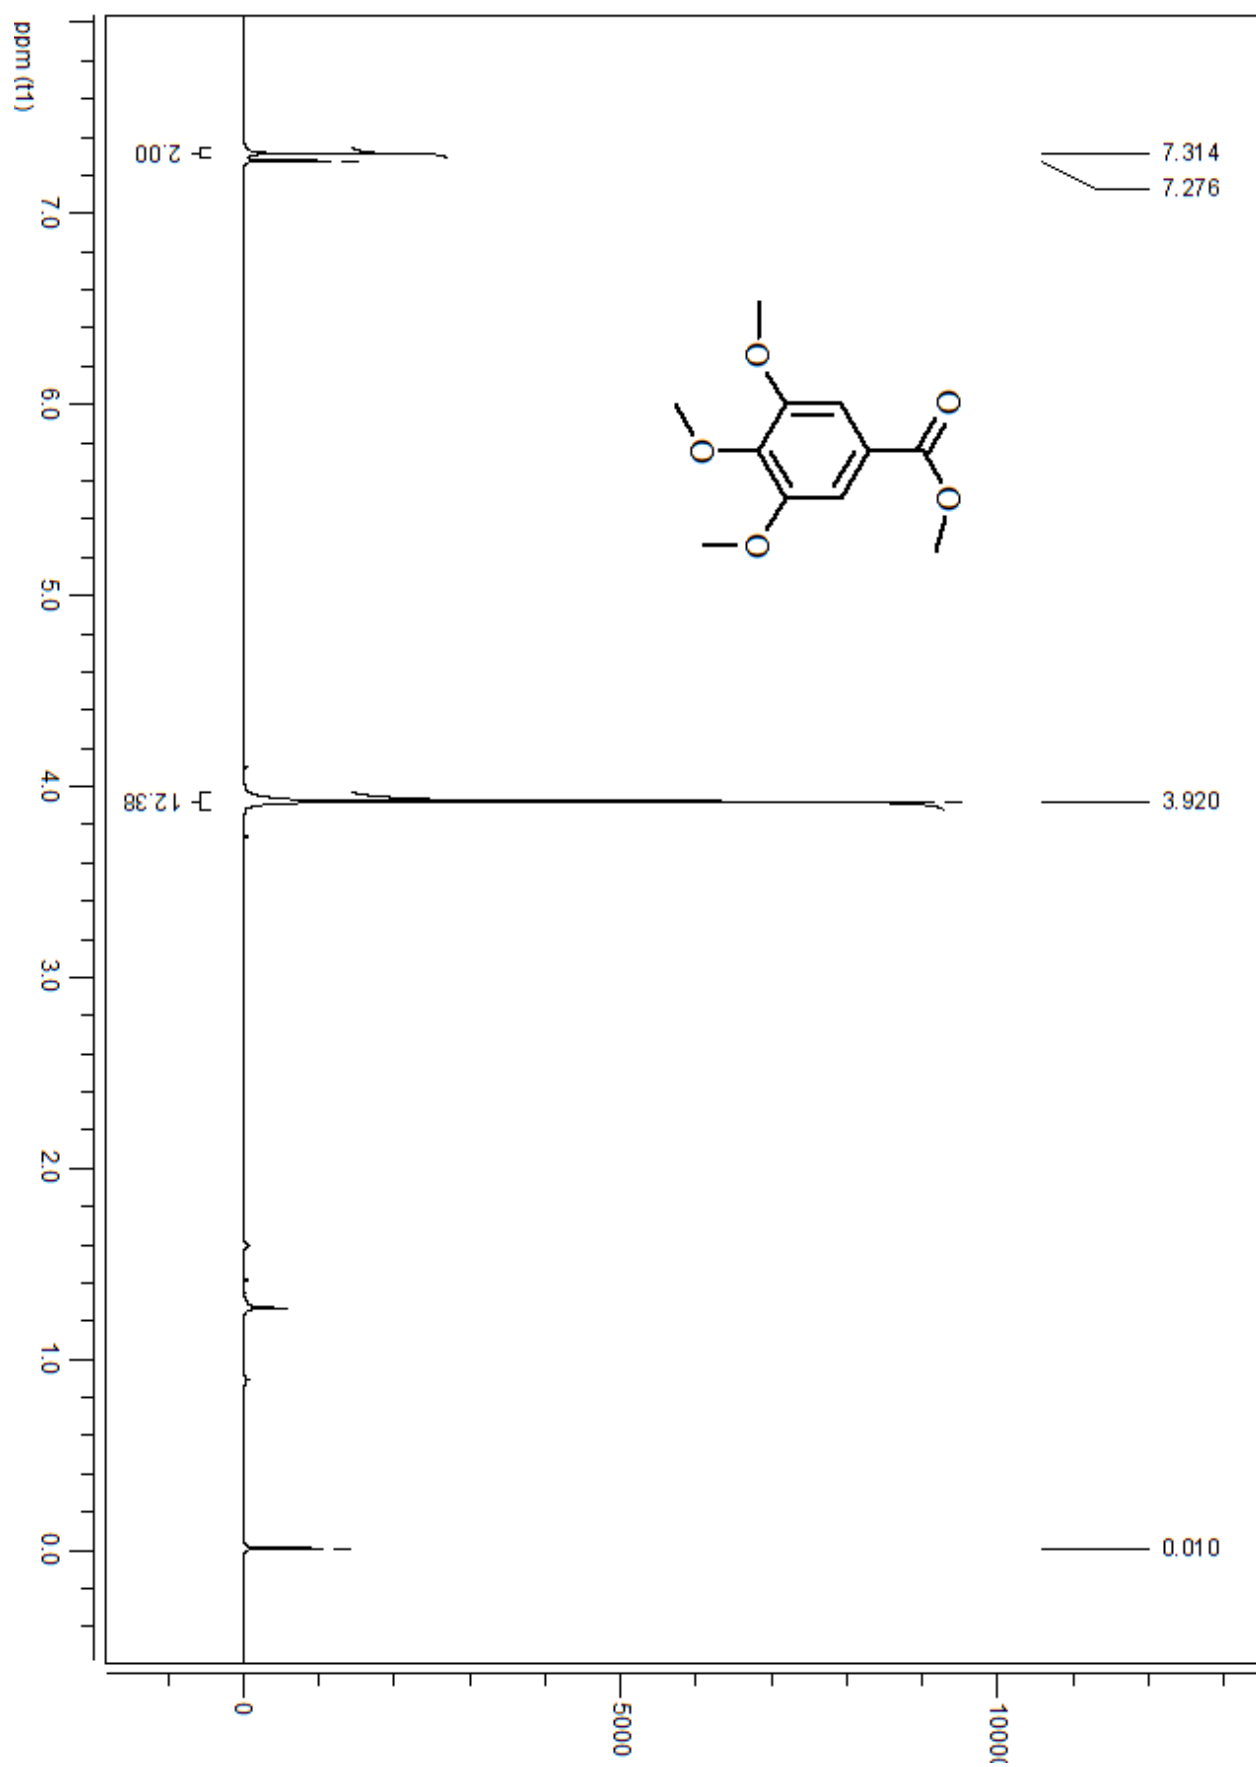

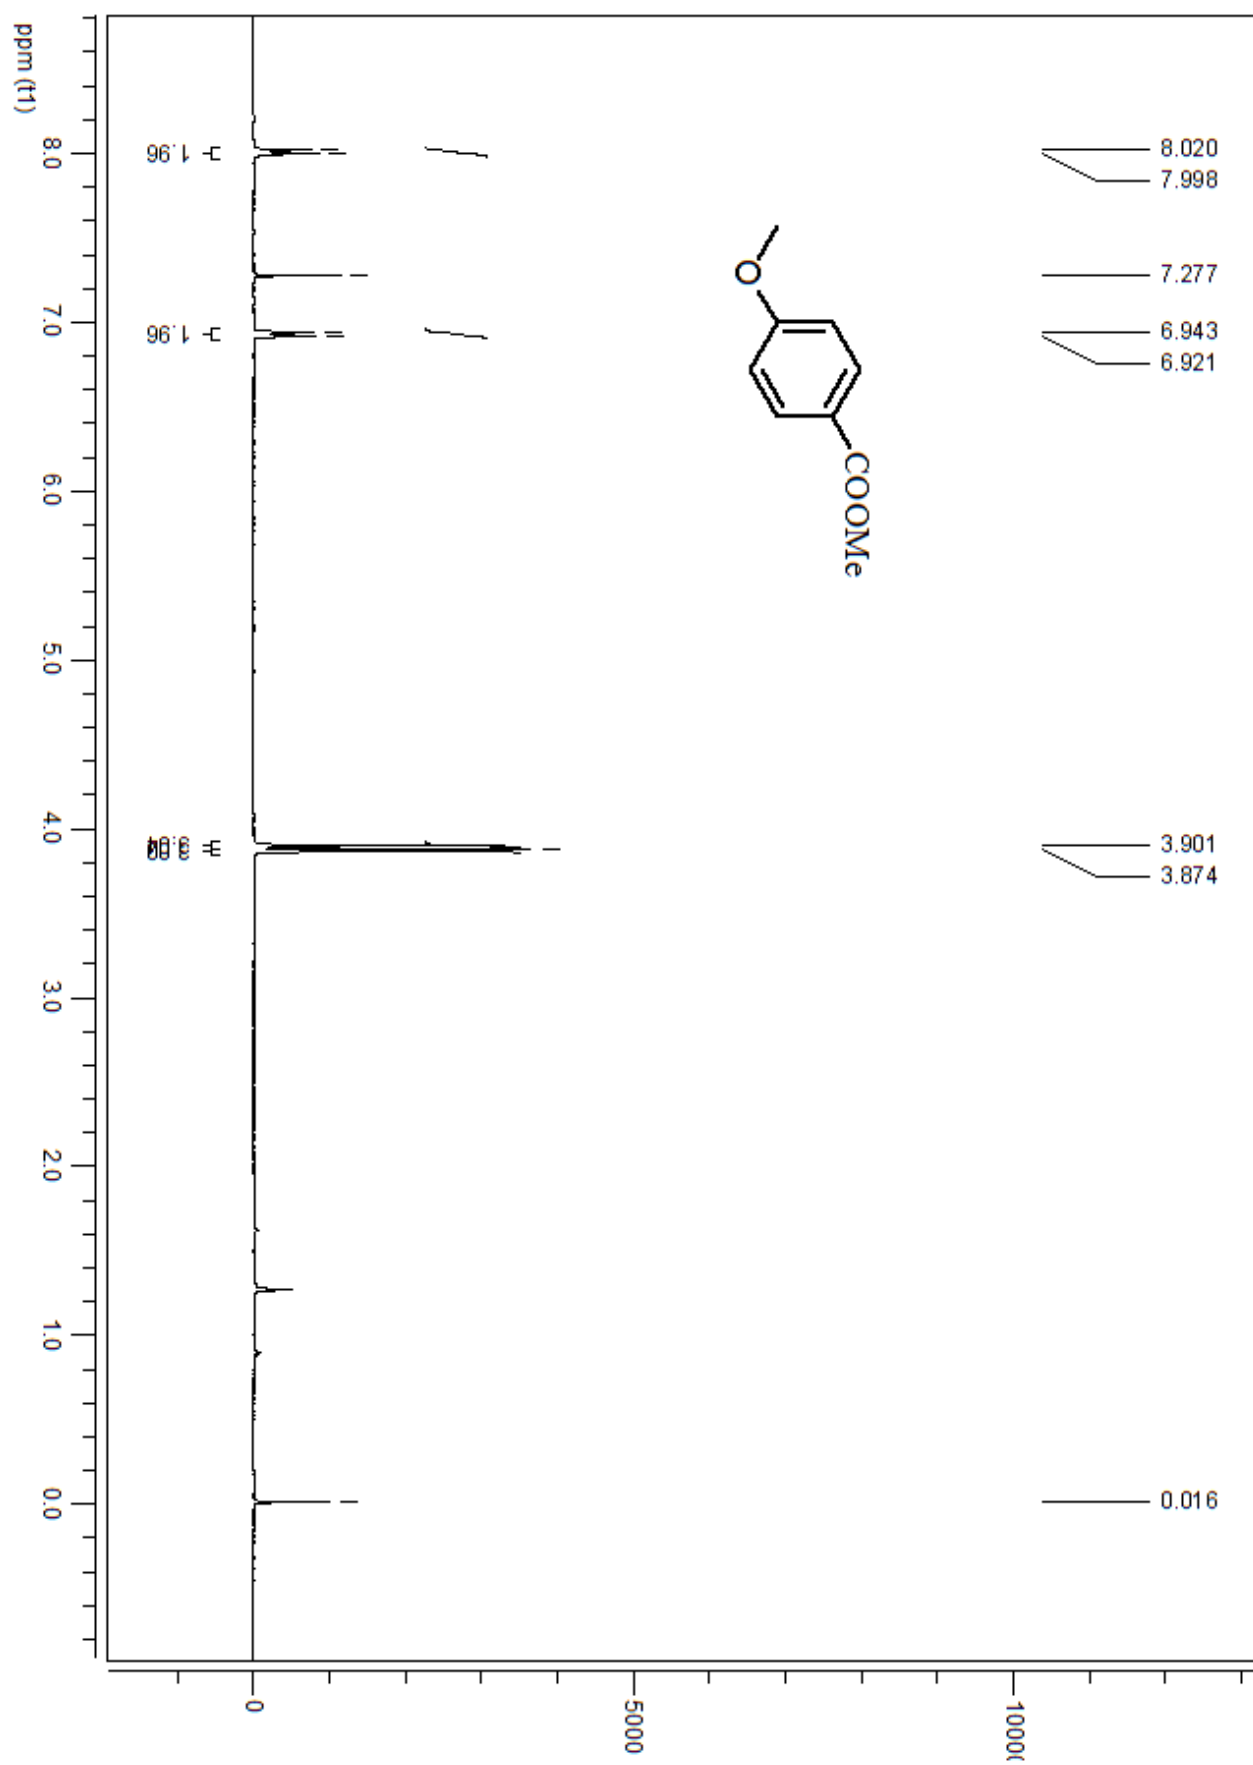

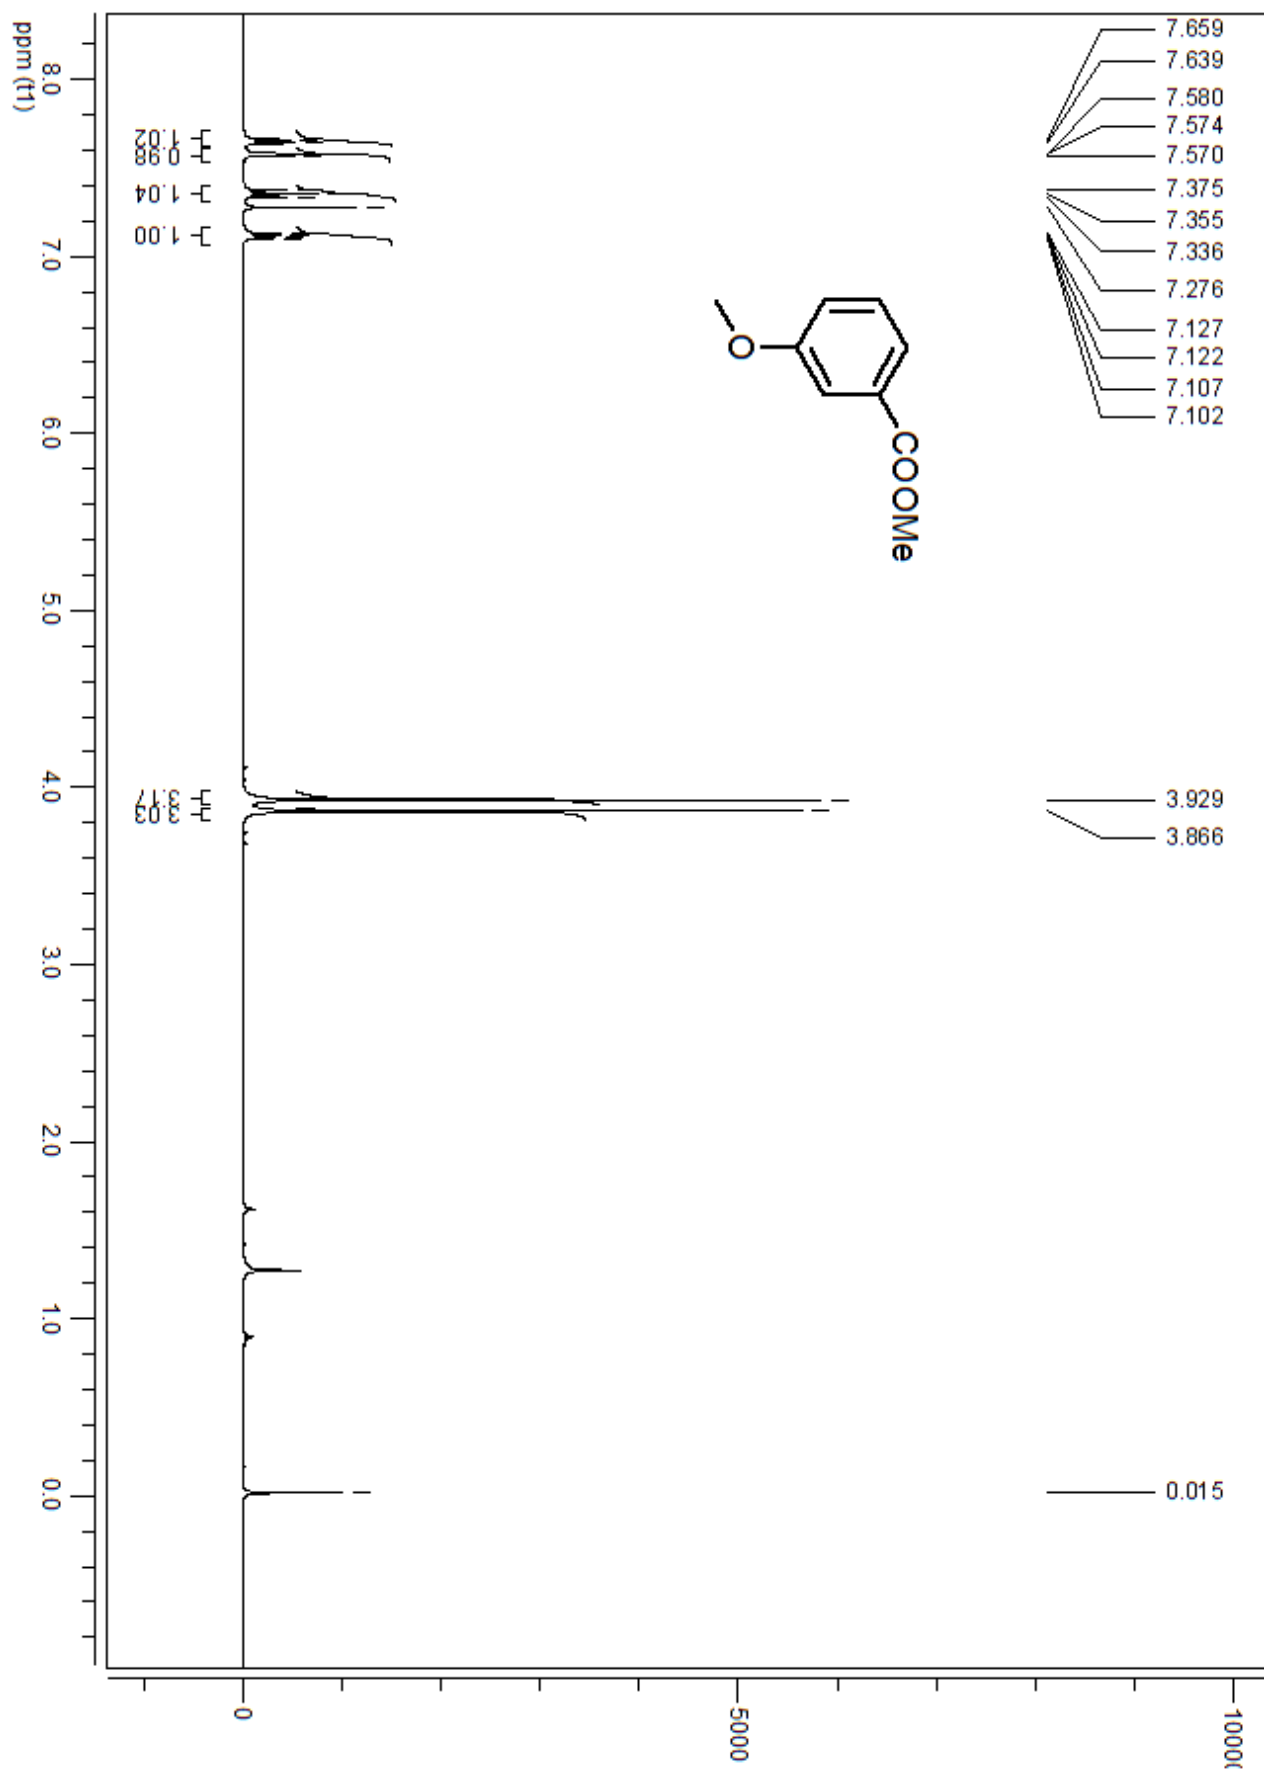

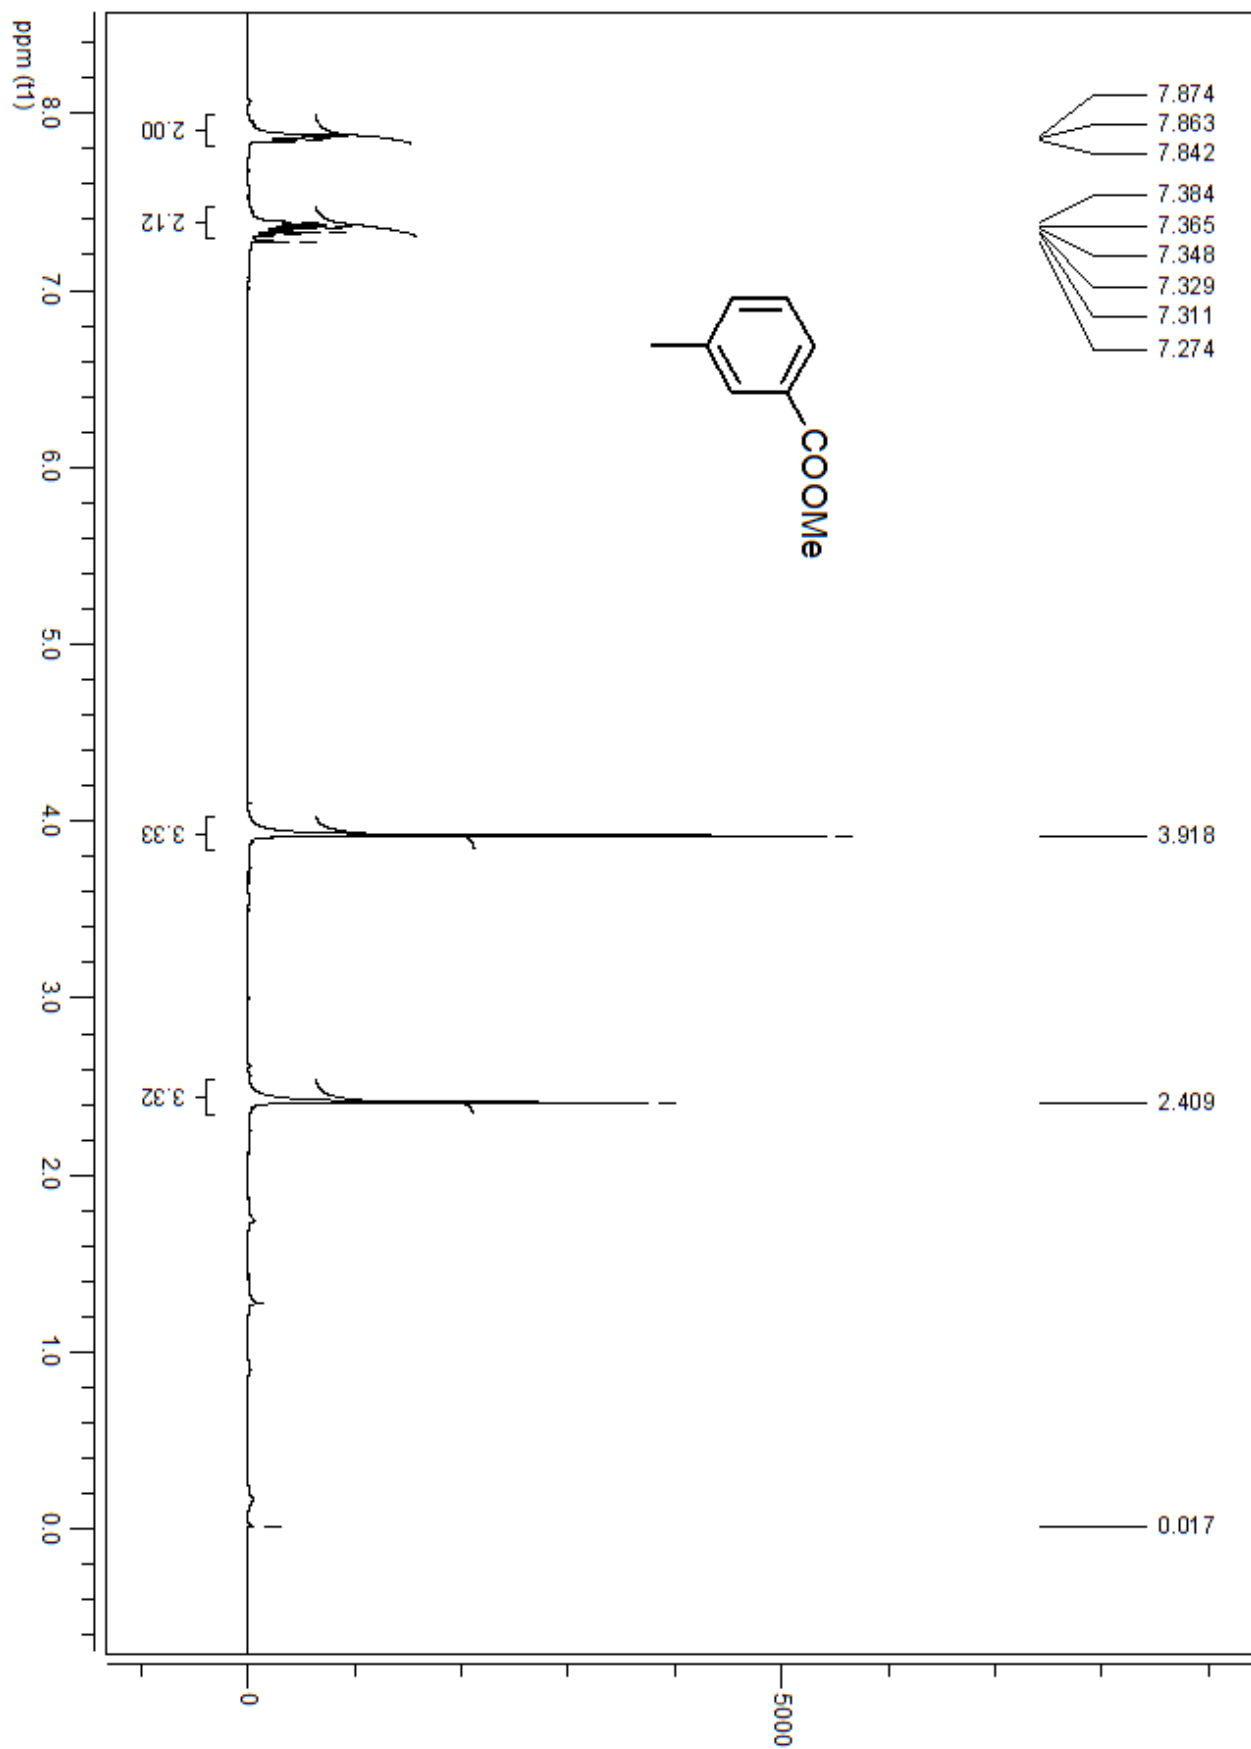

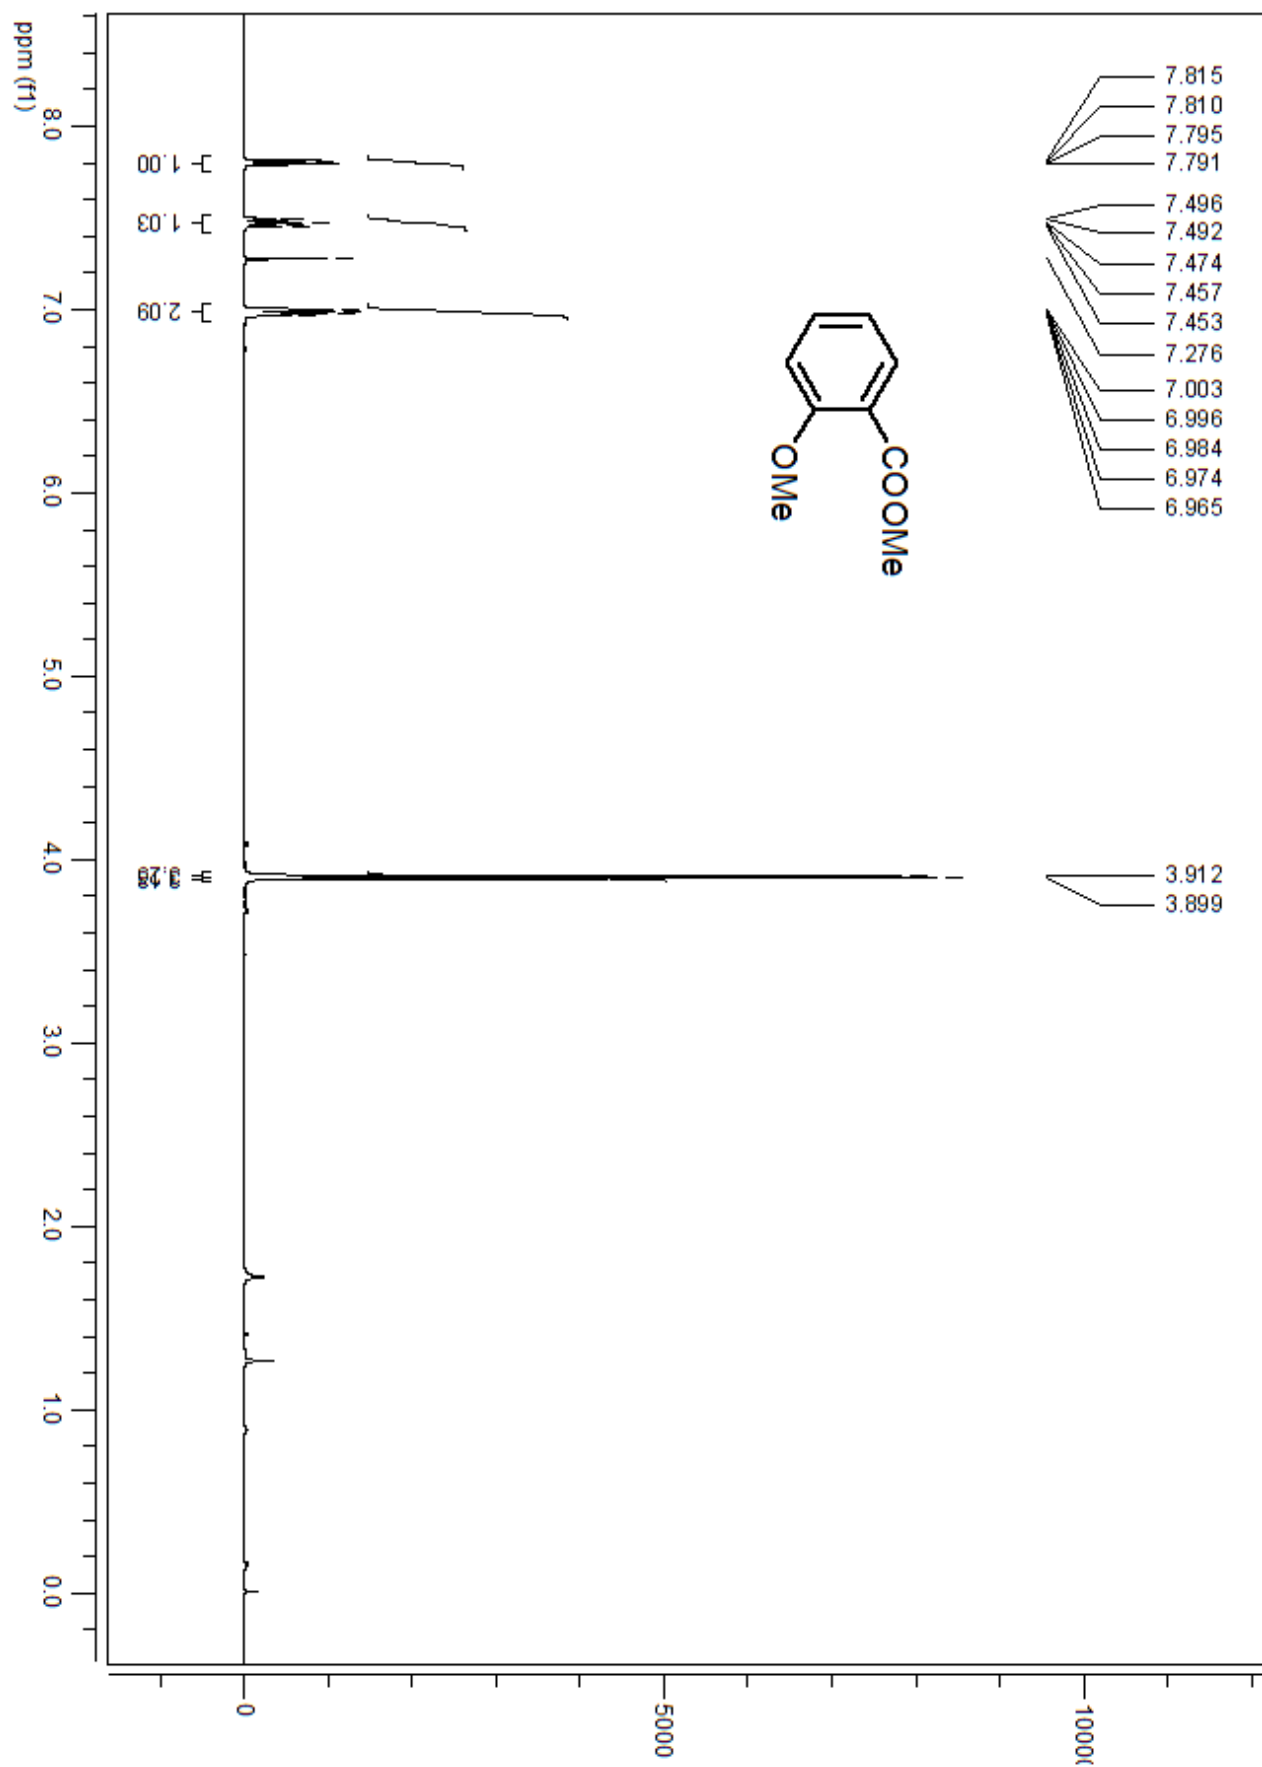

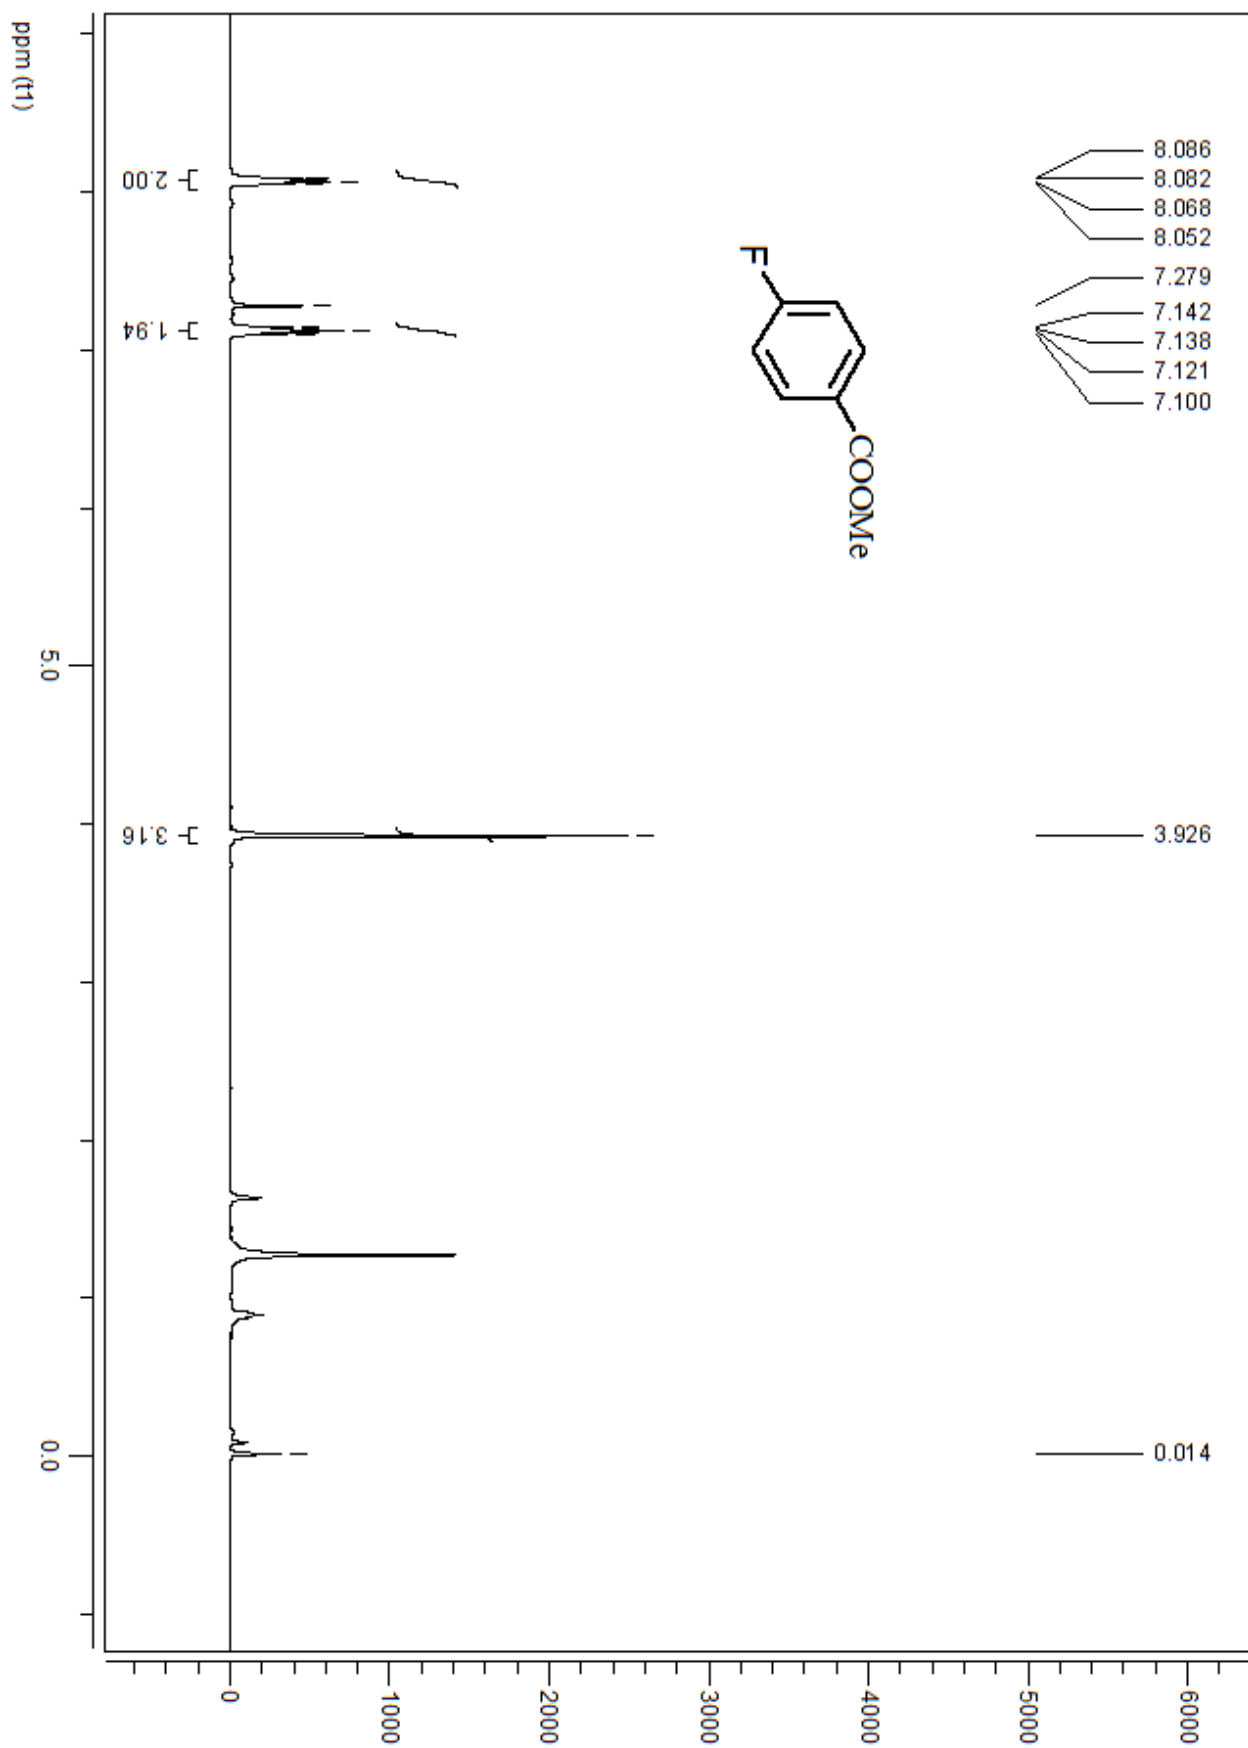

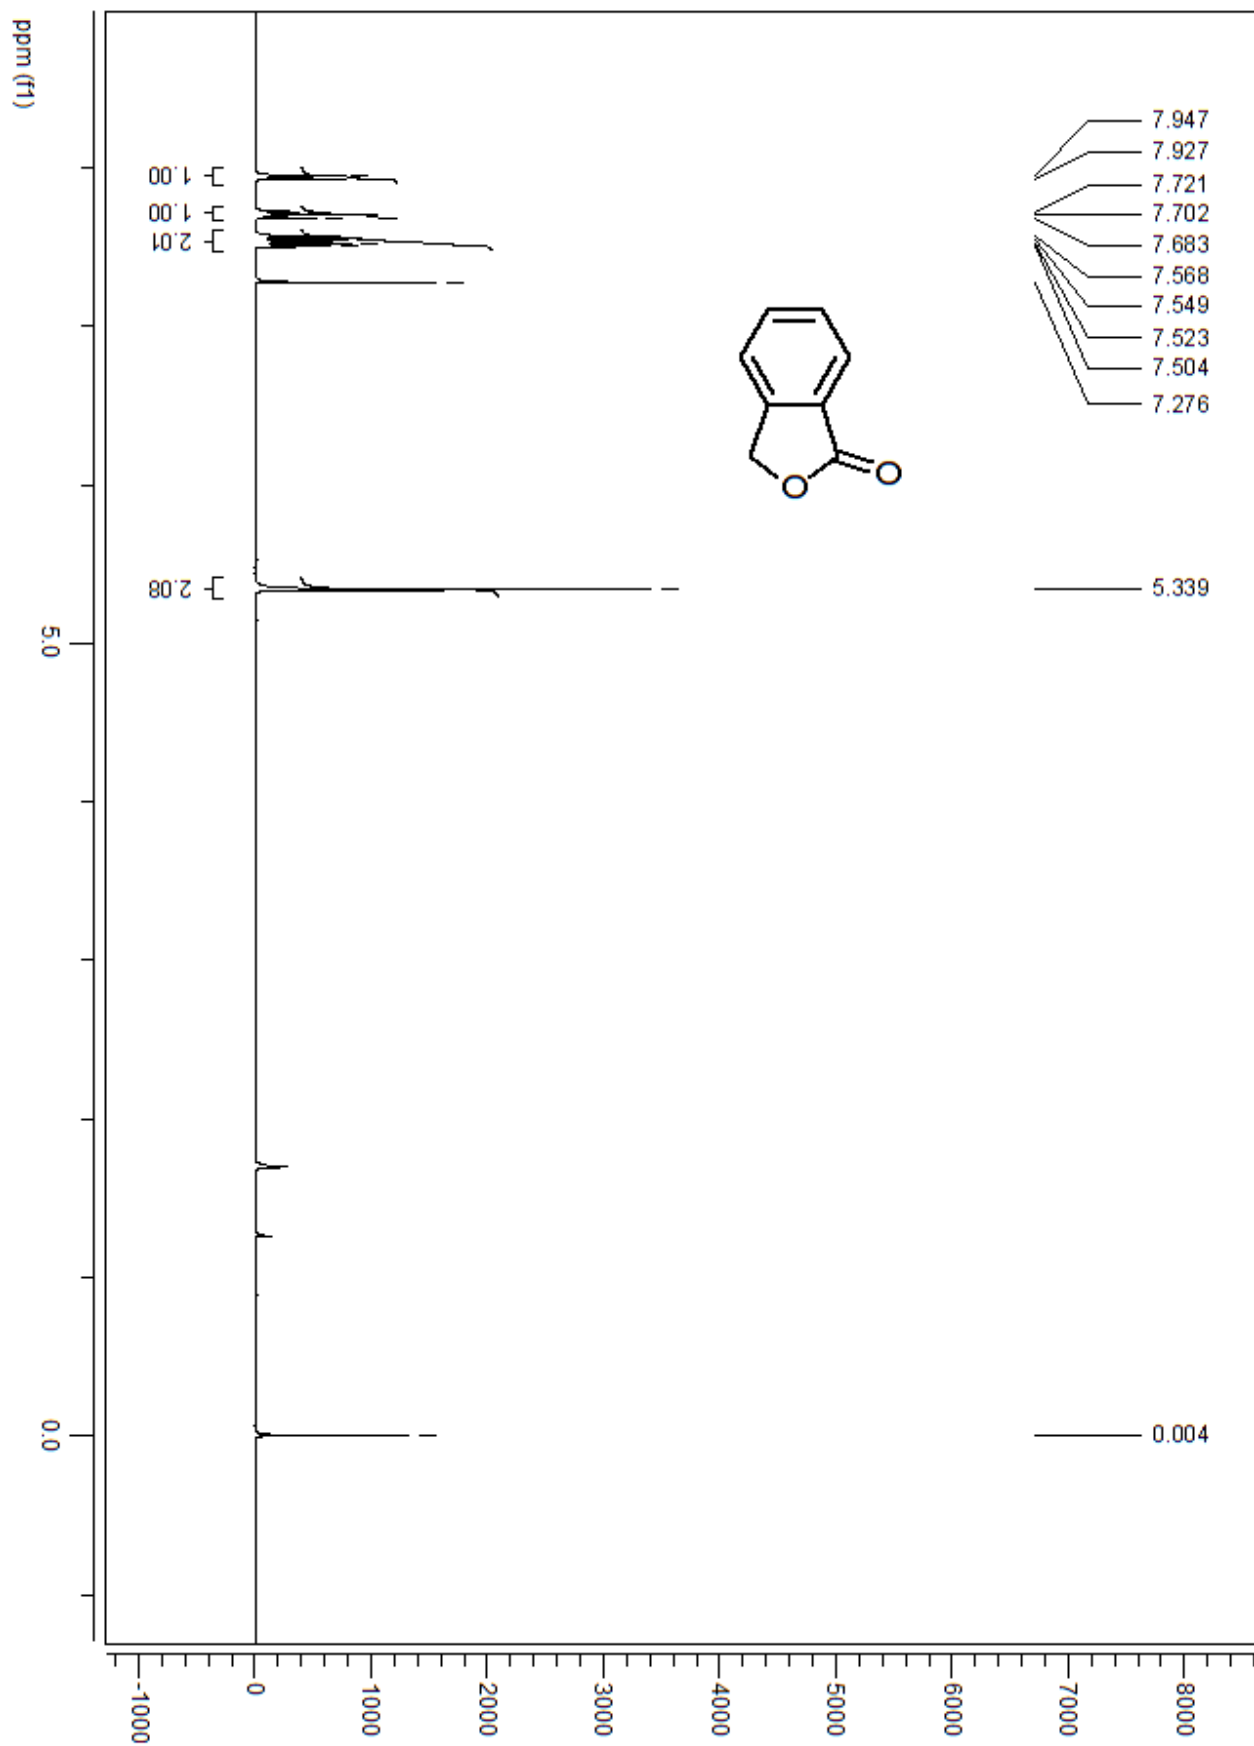



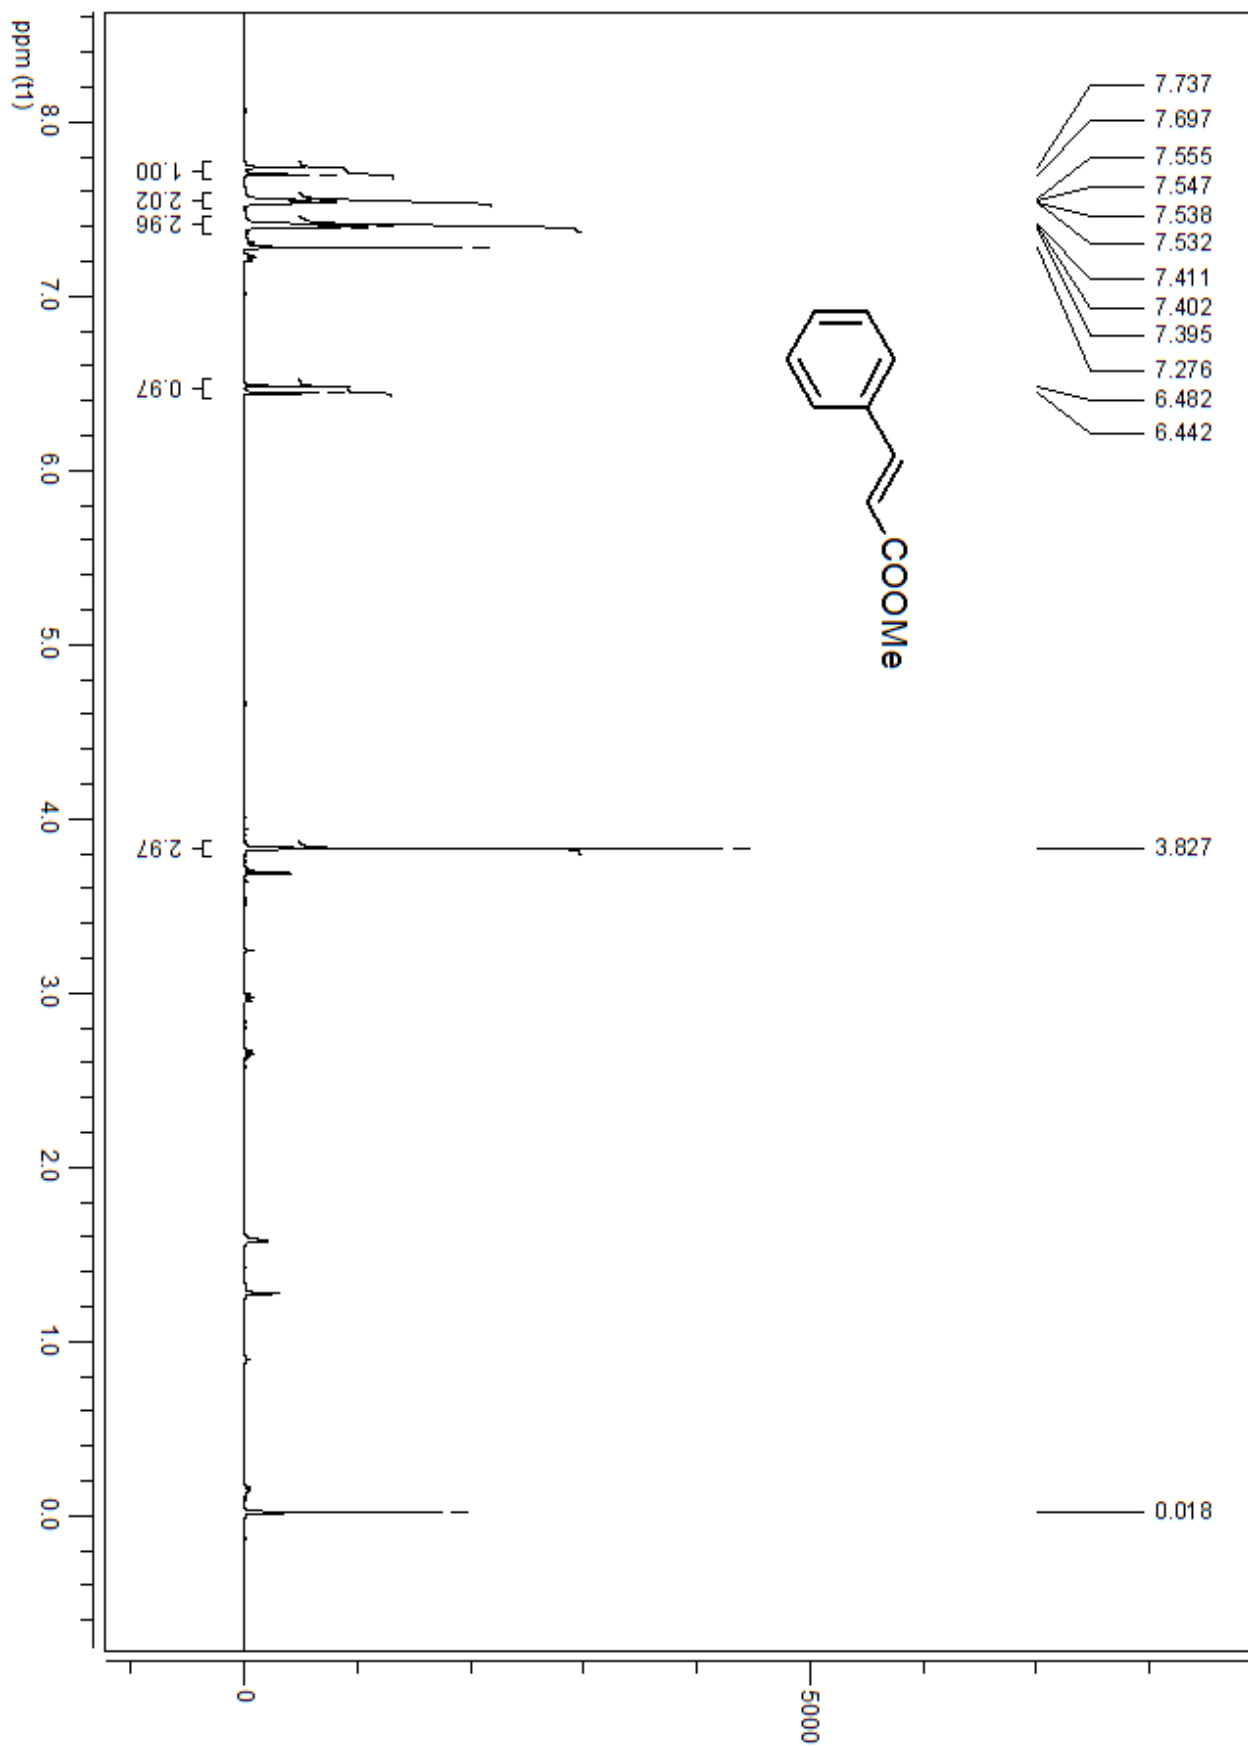

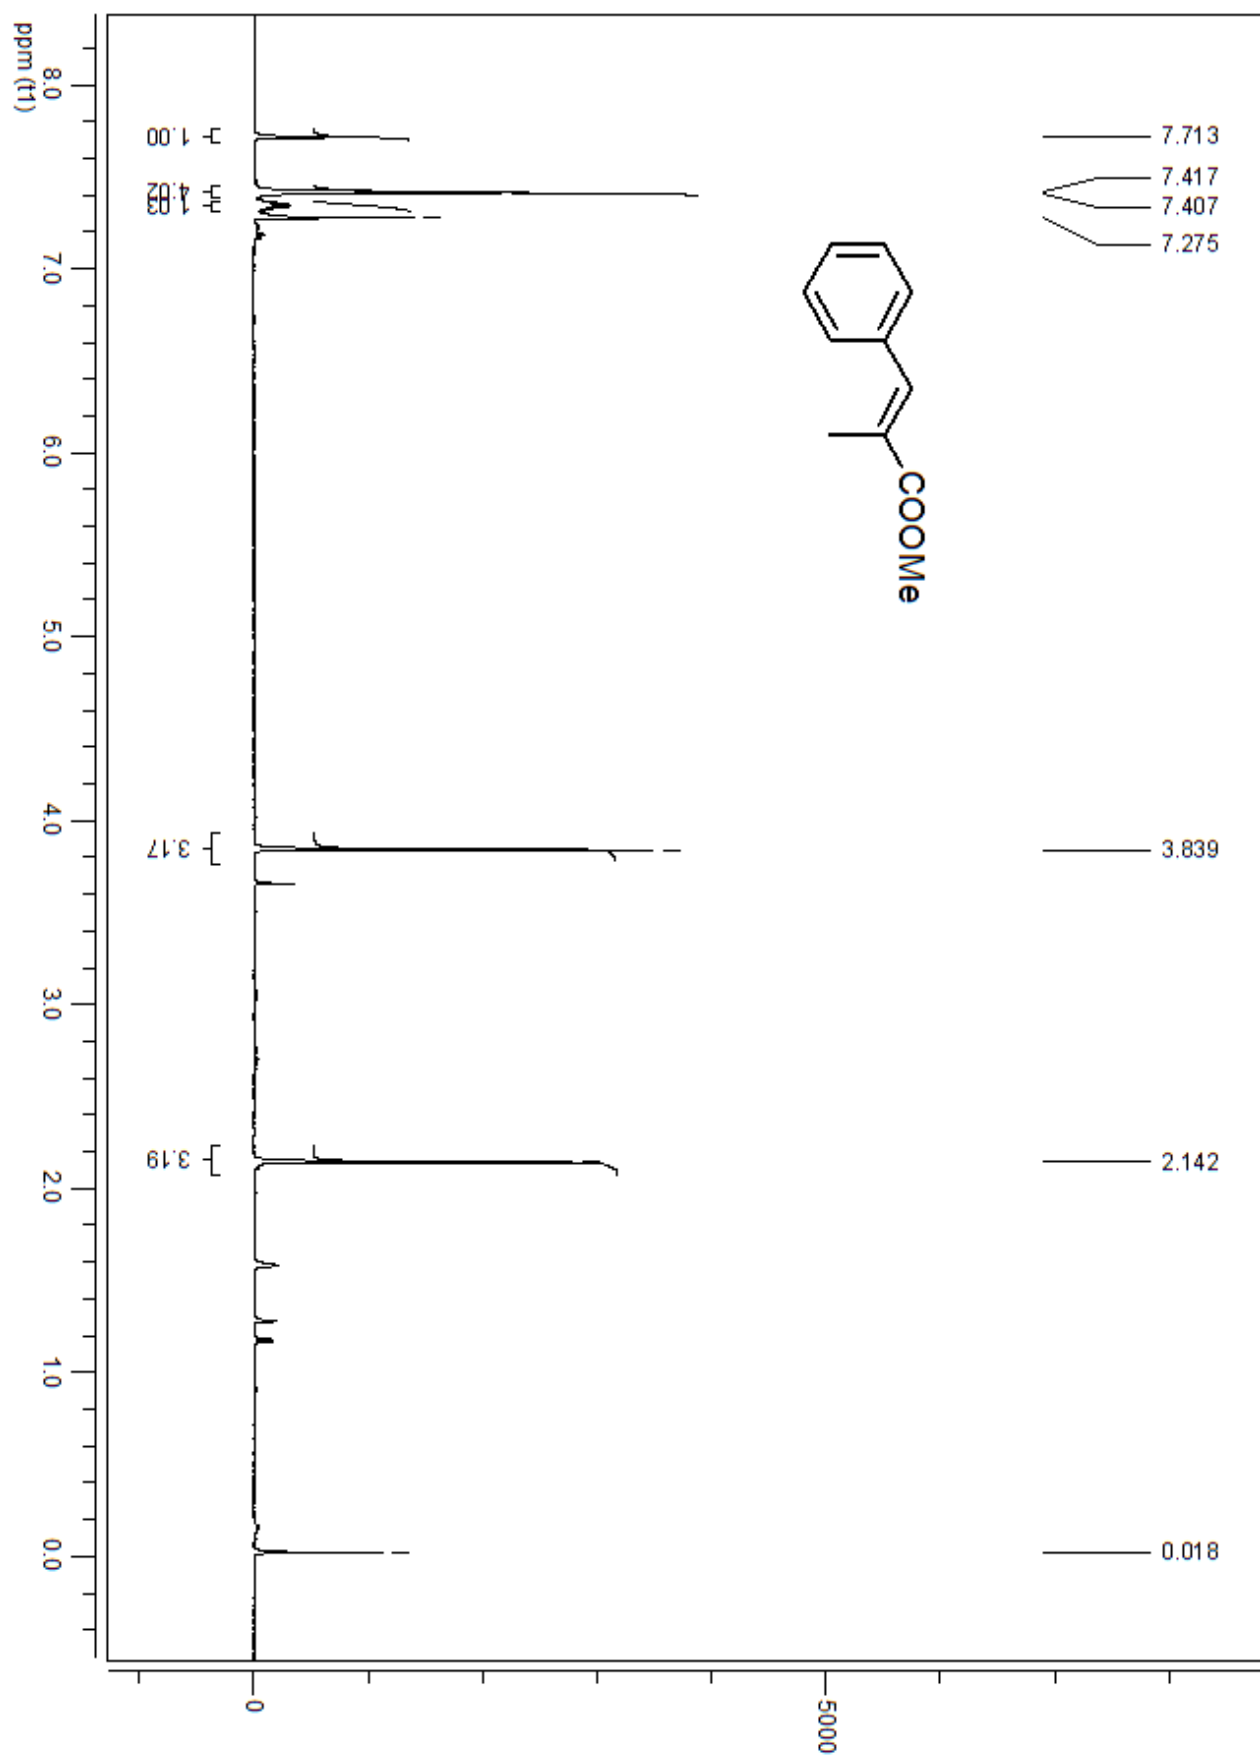

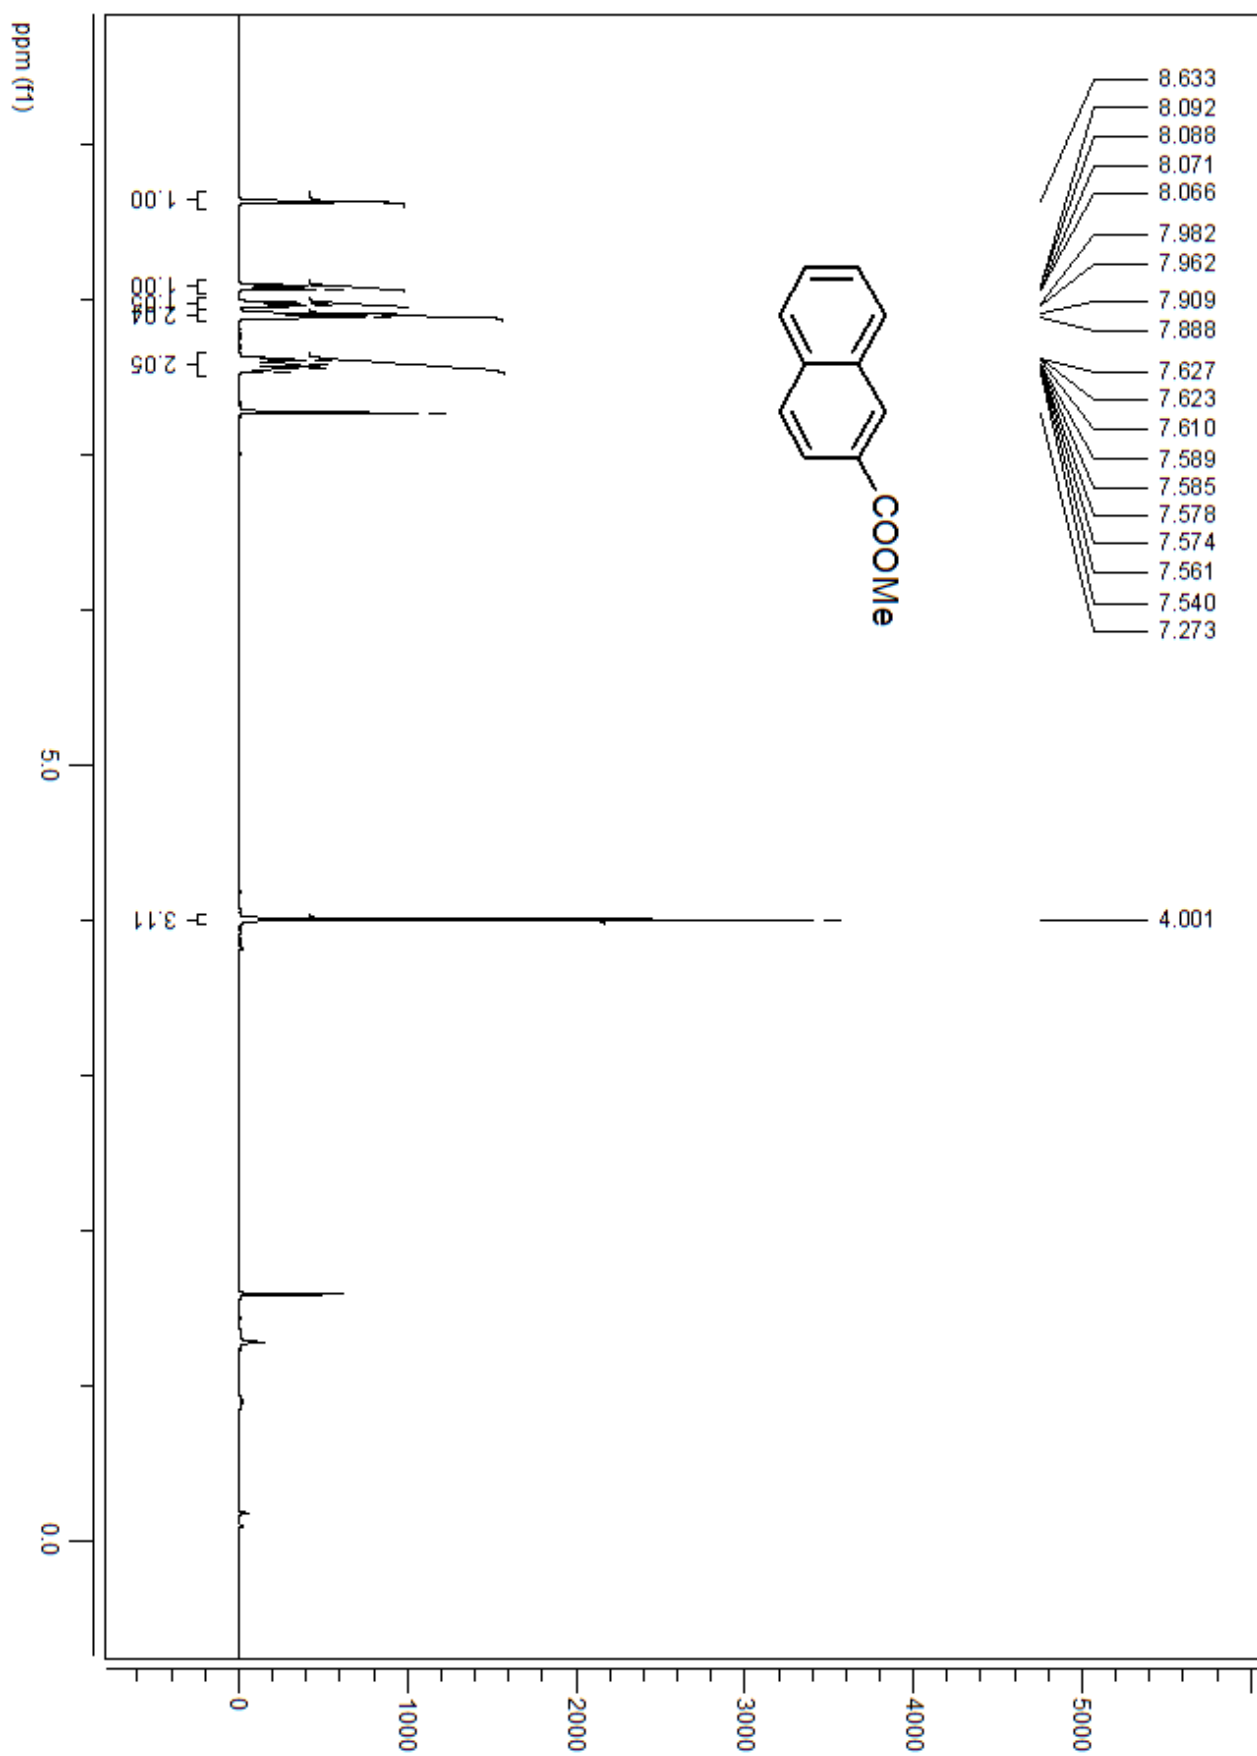

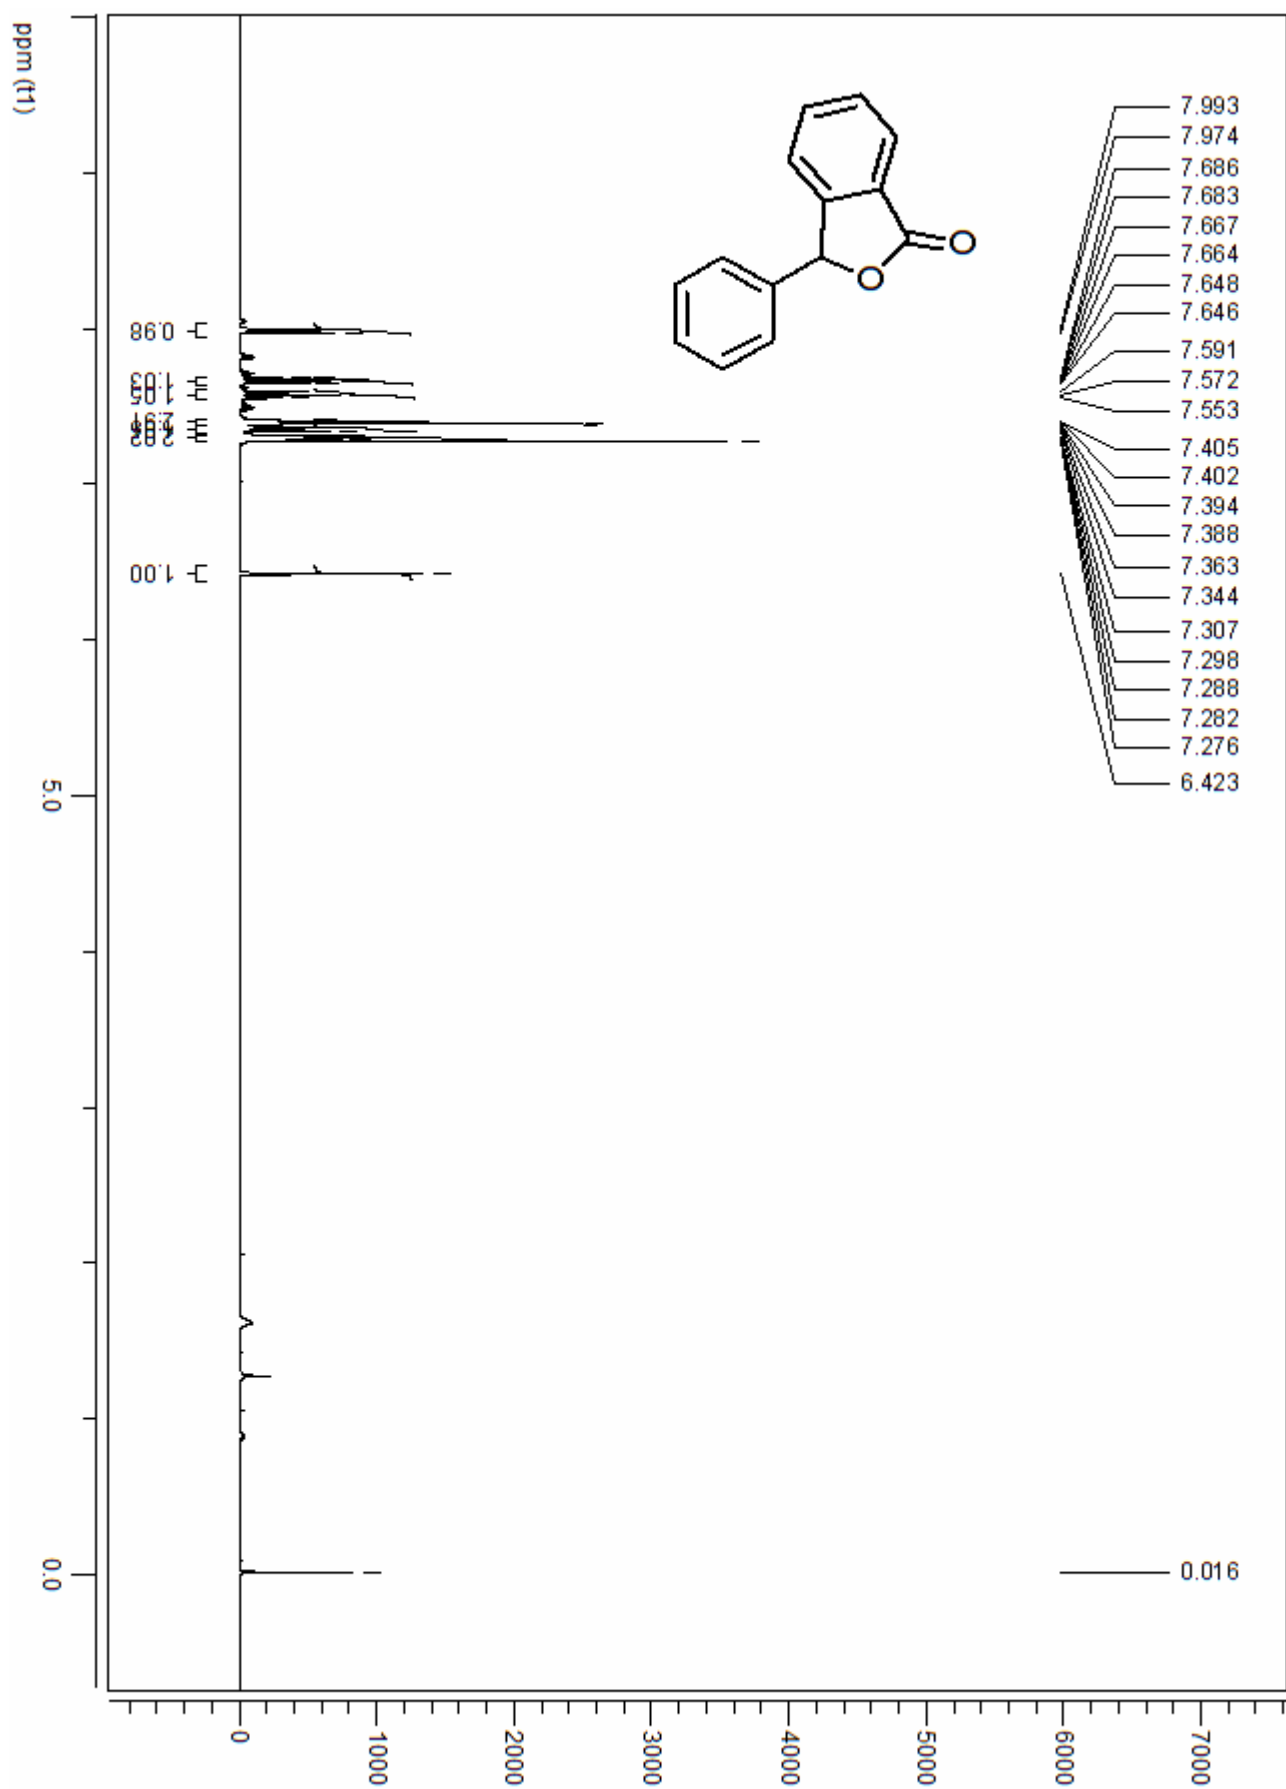

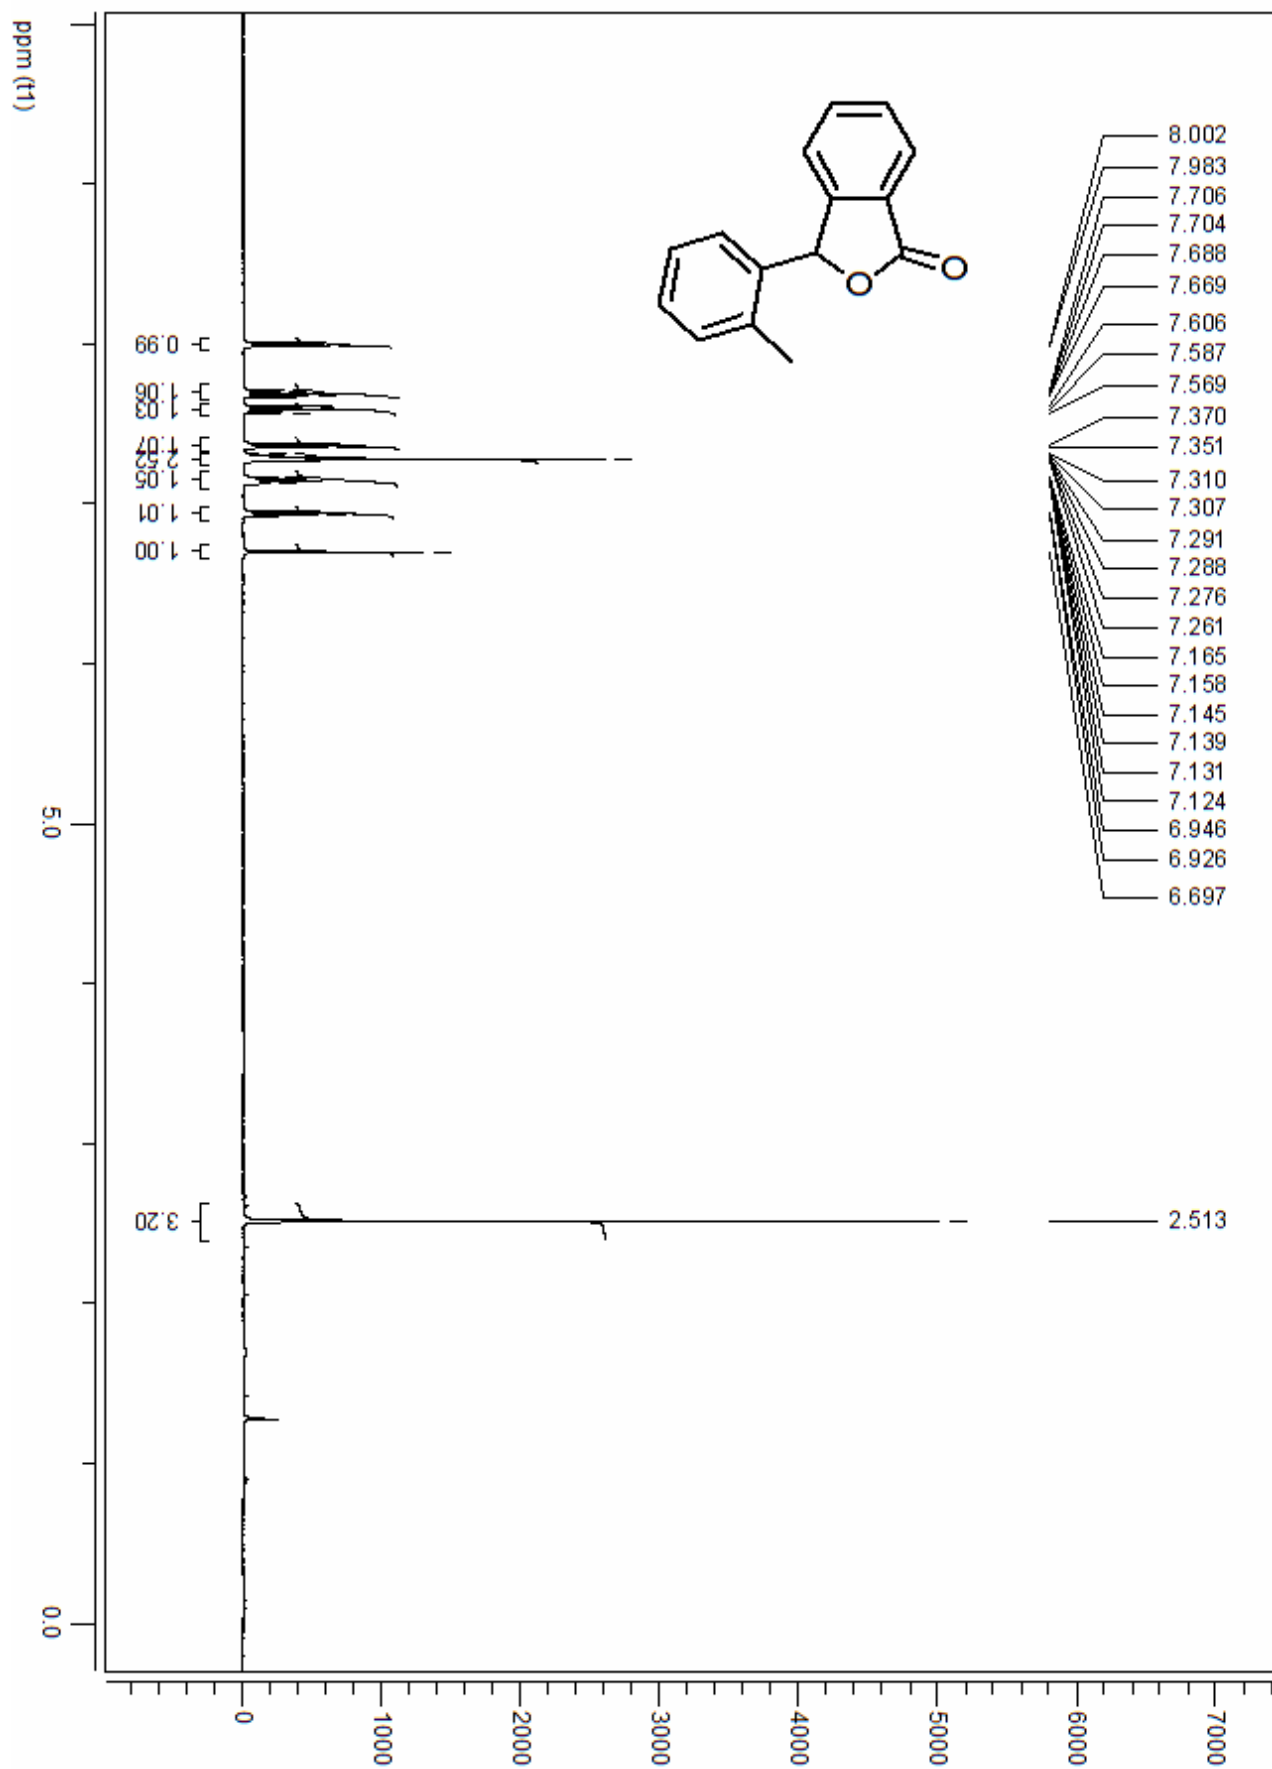

Supplement: c2cc34117d.pdf [file c2cc34117d.pdf]
